# Supplementary material for: Morphological and Physiological Mechanisms of Melatonin on Delaying Drought-Induced Leaf Senescence in Cotton
Source: MDPI journal article supplement (doi:10.3390/ijms24087269), 2023-04-14
Supplement: s1 [file s1]

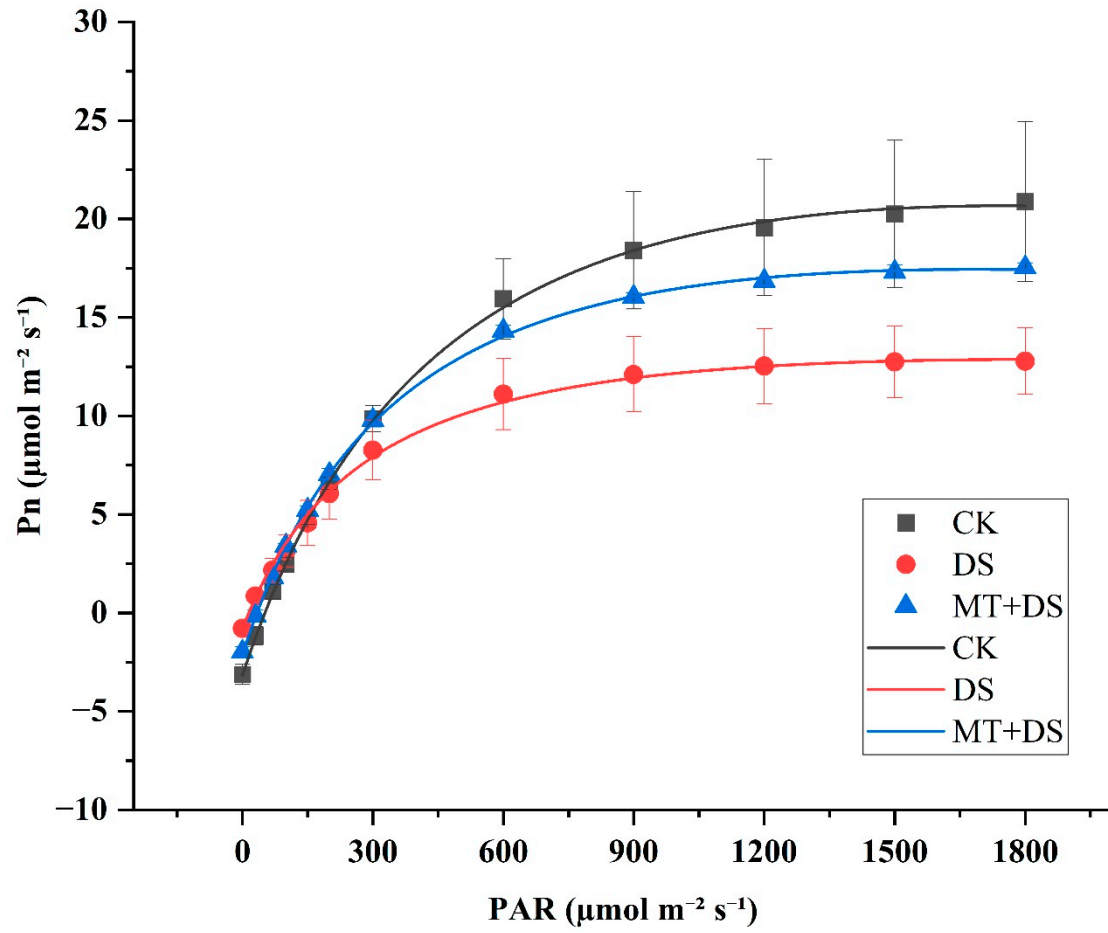

**Figure S1.** Effects of melatonin on the light response curve of cotton seedlings during drought-induced senescence. CK denotes well-watered + 0  $\mu\text{M}$  MT treatment; DS denotes drought stress + 0  $\mu\text{M}$  MT treatment; MT+DS denotes drought stress + 100  $\mu\text{M}$  MT treatment.

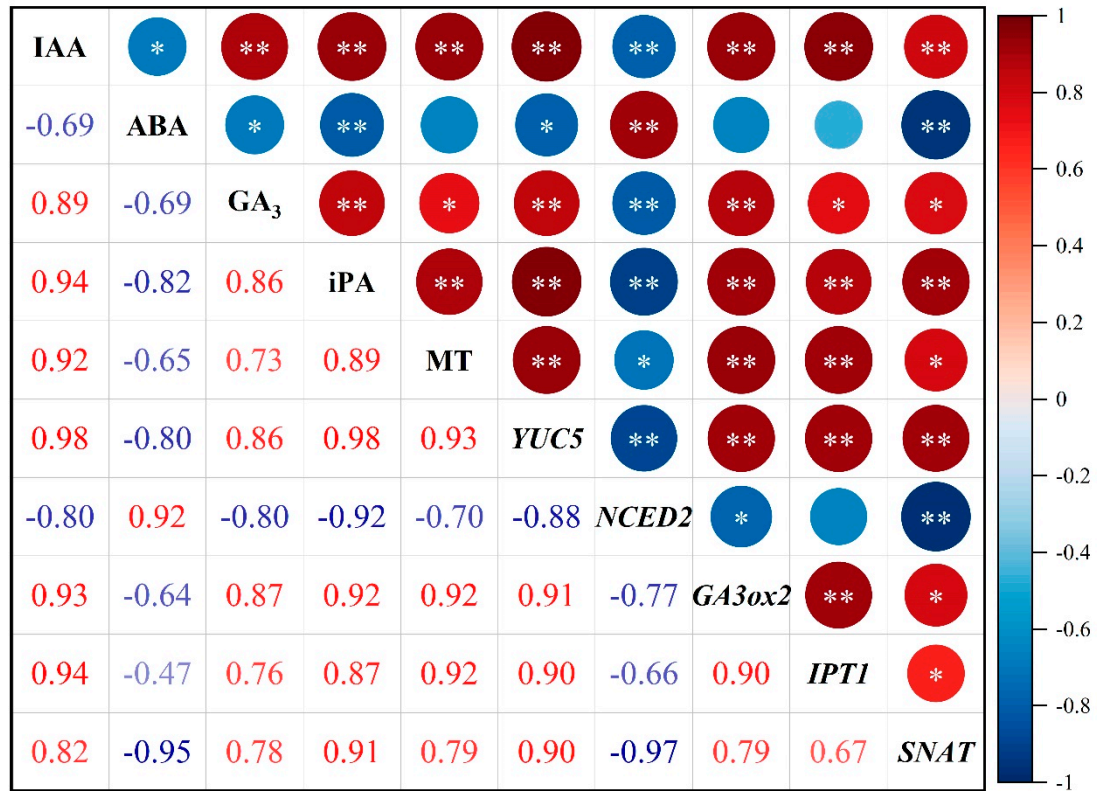

**Figure S2.** Pearson's correlation coefficient showing the relationship between endogenous hormone content and key genes of hormone synthesis. The significance level of correlations is indicated as \* denoting  $p < 0.05$  or \*\* denoting  $p < 0.01$ .

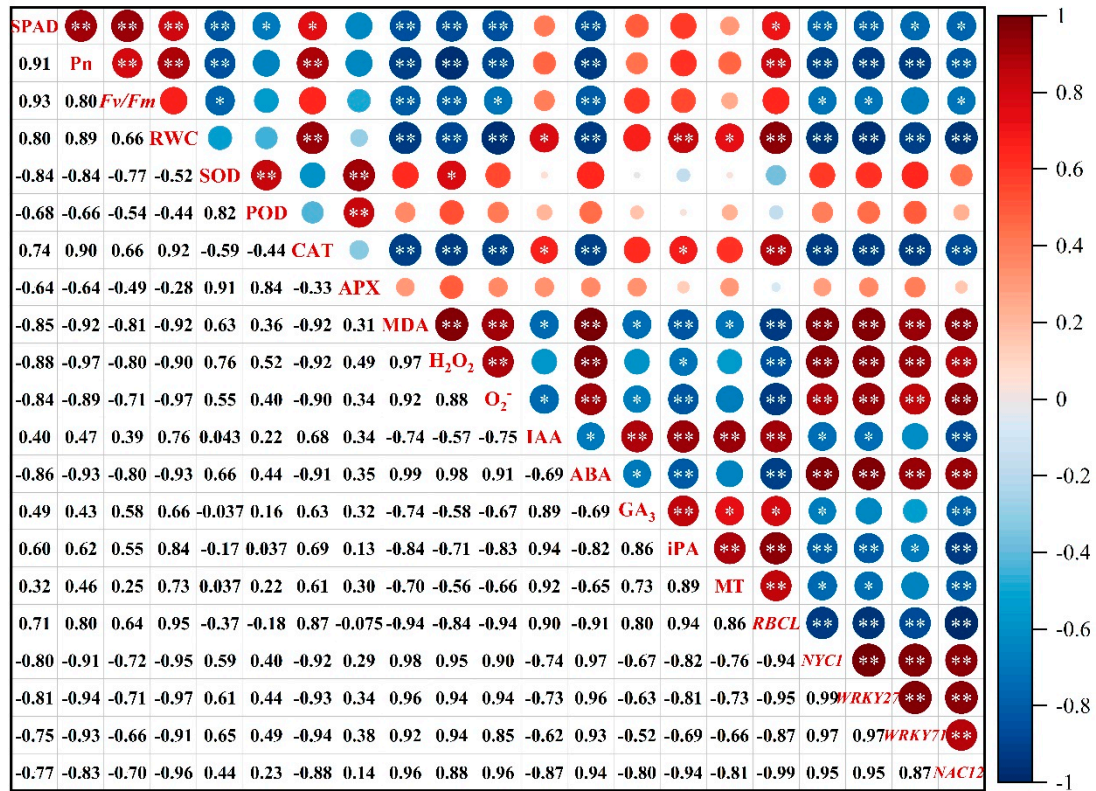

**Figure S3.** The Pearson correlation coefficients matrix and 95% confidential circle among the physiological indicators and senescence-related gene expression in cotton seedlings. The significance level of correlations is indicated as \* denoting  $p < 0.05$  or \*\* denoting  $p < 0.01$ . SPAD: spad value; Pn: net photosynthetic rate; Fv/Fm: maximum photochemical efficiency; RWC: relative water content; SOD: superoxide dismutase activity; POD: peroxidase activity; CAT: catalase activity; APX: ascorbate peroxidase activity; MDA: malonaldehyde contents; H<sub>2</sub>O<sub>2</sub>: H<sub>2</sub>O<sub>2</sub> contents; O<sub>2</sub><sup>-</sup>: O<sub>2</sub><sup>-</sup> contents; IAA: auxin contents; ABA: abscisic acid contents; GA<sub>3</sub>: gibberellin acid contents; iPA: isopentenyladenine contents; MT: melatonin contents; *RBCL*: transcript levels of *GhRBCL*; *NYCI*: transcript levels of *GhNYCI*; *WRKY27*: transcript levels of *GhWRKY27*; *WRKY71*: transcript levels of *GhWRKY71*; *NAC12*: transcript levels of *GhNAC12*.

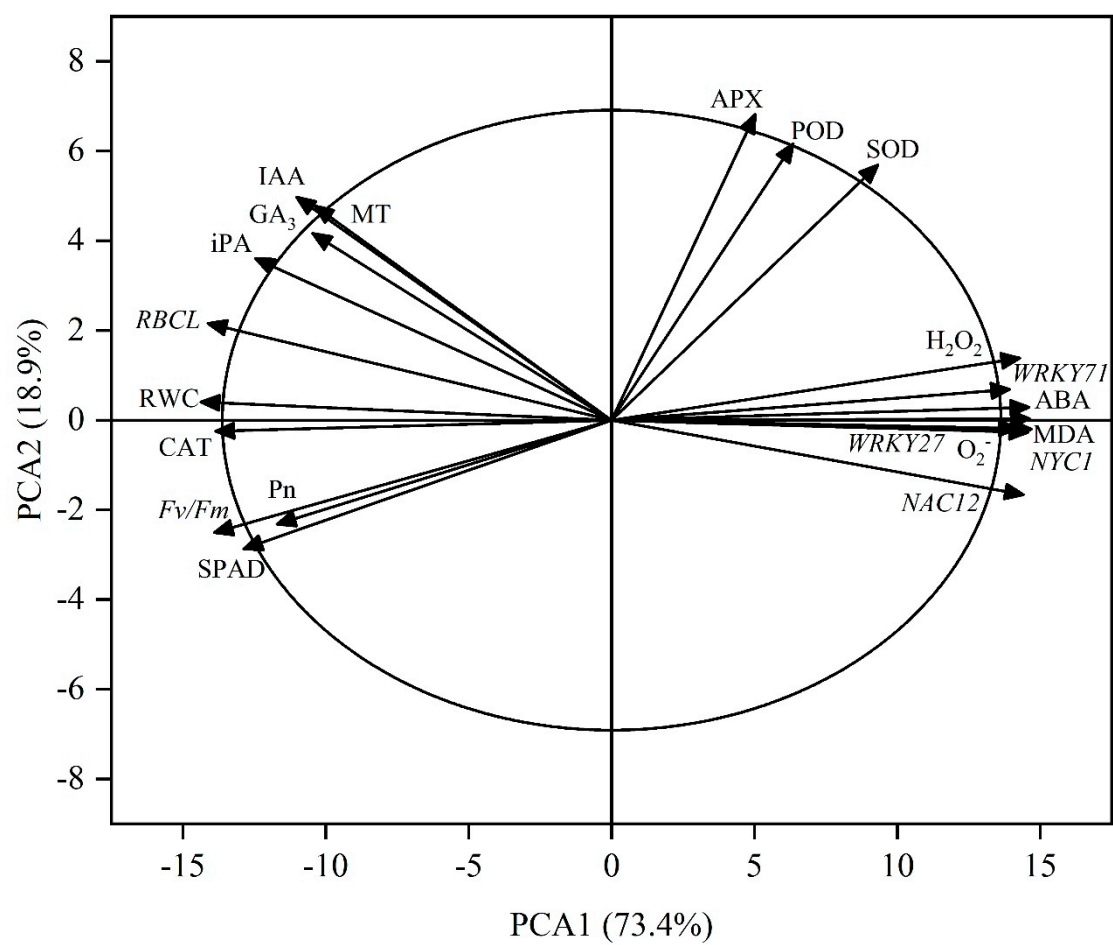

**Figure S4.** Principal component analysis (PCA) of the 21 representative leaf senescence traits (abbreviations are as expounded in Fig. S3).
