# Supplementary material for: Morphological and Physiological Mechanisms of Melatonin on Delaying Drought-Induced Leaf Senescence in Cotton
Source: Int J Mol Sci. 2023 Apr 14;24(8):7269. doi: 10.3390/ijms24087269 (PMC10138977; doi:10.3390/ijms24087269)
Supplement: Supplementary file 1 [file ijms-24-07269-s001.zip › Raw date-SPSS-ANOVA.xlsx]

## Sheet: Sheet1
NEW FILE.
SET OLang=English Unicode=Yes Locale=OSLOCALE Small=0.0001 THREADS=AUTO Printback=On BASETEXTDIRECTION=AUTOMATIC DIGITGROUPING=No TLook=None SUMMARY=None MIOUTPUT=[OBSERVED IMPUTED POOLED DIAGNOSTICS] TFit=Both LEADZERO=No TABLERENDER=light.
SET TLook=None Small=0.0001 SUMMARY=None THREADS=AUTO TFit=Both DIGITGROUPING=No LEADZERO=No TABLERENDER=light.
ONEWAY Plantheight Leafarea SPAD BY Treatment
/POLYNOMIAL=1
/STATISTICS DESCRIPTIVES EFFECTS HOMOGENEITY
/MISSING ANALYSIS
/POSTHOC=SNK DUNCAN LSD ALPHA(0.05).
Oneway
Notes
Output Created		19-MAR-2023 11:26:23
Comments
Input	Data	D:\desktop\paper2\spss\1P.sav
	Active Dataset	date0
	Filter	<none>
	Weight	<none>
	Split File	<none>
	N of Rows in Working Data File	54
Missing Value Handling	Definition of Missing	User-defined missing values are treated as missing.
	Cases Used	Statistics for each analysis are based on cases with no missing data for any variable in the analysis.
Syntax		ONEWAY Plantheight Leafarea SPAD BY Treatment /POLYNOMIAL=1 /STATISTICS DESCRIPTIVES EFFECTS HOMOGENEITY /MISSING ANALYSIS /POSTHOC=SNK DUNCAN LSD ALPHA(0.05).
Resources	Processor Time	00:00:00.23
	Elapsed Time	00:00:00.24
Descriptives
			N	Mean	Std. Deviation	Std. Error	95% Confidence Interval for Mean		Minimum	Maximum	Between- Component Variance
							Lower Bound	Upper Bound
Plantheight	CK-0d		6	25.7	0.493964	0.20166	25.1816	26.2184	25.1	26.4
	DS-0d		6	25.7167	0.556477	0.227181	25.1327	26.3007	25.2	26.7
	MT+DS-0d		6	25.7833	0.788458	0.321887	24.9559	26.6108	24.5	26.8
	CK-7d		6	32.05	0.717635	0.292973	31.2969	32.8031	31	33
	DS-7d		6	28.0667	0.84538	0.345125	27.1795	28.9538	26.9	29.3
	MT+DS-7d		6	29.9	0.792465	0.323522	29.0684	30.7316	28.5	30.6
	CK-14d		6	37.25	1.12916	0.460977	36.065	38.435	36	39
	DS-14d		6	29.9167	1.59426	0.650854	28.2436	31.5897	27.5	32
	MT+DS-14d		6	34.9167	0.801041	0.327024	34.076	35.7573	34	36
	Total		54	29.9222	4.05852	0.552294	28.8145	31.03	24.5	39
	Model	Fixed Effects			0.912343	0.124154	29.6722	30.1723
		Random Effects				1.39072	26.7152	33.1292			17.2683
Leafarea	CK-0d		6	250.688	18.3068	7.4737	231.476	269.899	236.625	284.438
	DS-0d		6	248.594	16.4096	6.69919	231.373	265.815	225.938	268.875
	MT+DS-0d		6	249.344	13.183	5.38192	235.509	263.178	234	269.625
	CK-7d		6	551.976	23.9124	9.76219	526.882	577.071	523.237	585.375
	DS-7d		6	434.789	21.8719	8.92916	411.836	457.742	397.373	456.66
	MT+DS-7d		6	478.866	22.4575	9.16825	455.299	502.434	443.738	501.3
	CK-14d		6	751.665	47.2008	19.2697	702.131	801.199	700.5	819
	DS-14d		6	567.545	37.8535	15.4536	527.82	607.27	512.565	603.188
	MT+DS-14d		6	685.719	21.7149	8.86508	662.93	708.507	650.625	708.75
	Total		54	468.798	182.624	24.852	418.952	518.645	225.938	819
	Model	Fixed Effects			26.8019	3.64727	461.452	476.144
		Random Effects				63.3792	322.646	614.951			36032.6
SPAD	CK-0d		6	48.95	1.03682	0.423281	47.8619	50.0381	47.9	50.6
	DS-0d		6	48.65	0.981326	0.400625	47.6202	49.6798	47.4	50
	MT+DS-0d		6	48.6833	1.18561	0.484022	47.4391	49.9276	46.8	49.8
	CK-7d		6	49.35	1.79972	0.734734	47.4613	51.2387	47.2	51.3
	DS-7d		6	47.1	1.46697	0.598888	45.5605	48.6395	44.8	49.2
	MT+DS-7d		6	48.3667	0.828654	0.338296	47.497	49.2363	47.5	49.7
	CK-14d		6	50.1333	1.11475	0.455095	48.9635	51.3032	48.5	51.5
	DS-14d		6	44.6833	1.71513	0.700198	42.8834	46.4833	42.2	46.5
	MT+DS-14d		6	47.1167	1.70812	0.697336	45.3241	48.9092	44.3	49.1
	Total		54	48.1148	1.97984	0.269422	47.5744	48.6552	42.2	51.5
	Model	Fixed Effects			1.35906	0.184944	47.7423	48.4873
		Random Effects				0.537121	46.8762	49.3534			2.28865
Test of Homogeneity of Variances
		Levene Statistic	df1	df2	Sig.
Plantheight	Based on Mean	1.86617	8	45	0.0894531
	Based on Median	1.71236	8	45	0.121673
	Based on Median and with adjusted df	1.71236	8	30.9959	0.134951
	Based on trimmed mean	1.86289	8	45	0.090046
Leafarea	Based on Mean	3.35208	8	45	0.00429257
	Based on Median	2.30108	8	45	0.0368267
	Based on Median and with adjusted df	2.30108	8	31.5749	0.0454034
	Based on trimmed mean	3.21127	8	45	0.00570371
SPAD	Based on Mean	1.25054	8	45	0.29306
	Based on Median	1.00214	8	45	0.447816
	Based on Median and with adjusted df	1.00214	8	37.75	0.450594
	Based on trimmed mean	1.24724	8	45	0.294802
ANOVA
				Sum of Squares	df	Mean Square	F	Sig.
Plantheight	Between Groups	(Combined)		835.537	8	104.442	125.475	3.67818e-28
		Linear Term	Contrast	493.506	1	493.506	592.893	1.50858e-27
			Deviation	342.03	7	48.8615	58.7016	1.60142e-20
	Within Groups			37.4567	45	0.83237
	Total			872.993	53
Leafarea	Between Groups	(Combined)		1.73531e+06	8	216914	301.965	1.83654e-36
		Linear Term	Contrast	1.31661e+06	1	1.31661e+06	1832.85	4.14848e-38
			Deviation	418700	7	59814.3	83.2672	1.28182e-23
	Within Groups			32325.4	45	718.341
	Total			1.76763e+06	53
SPAD	Between Groups	(Combined)		124.631	8	15.5789	8.43455	6.43687e-07
		Linear Term	Contrast	29.9867	1	29.9867	16.235	0.000212936
			Deviation	94.6448	7	13.5207	7.3202	7.37729e-06
	Within Groups			83.1167	45	1.84704
	Total			207.748	53
Post Hoc Tests
Multiple Comparisons
Dependent Variable				Mean Difference (I-J)	Std. Error	Sig.	95% Confidence Interval
							Lower Bound	Upper Bound
Plantheight	LSD	CK-0d	DS-0d	-0.0166667	0.526742	0.974898	-1.07758	1.04425
			MT+DS-0d	-0.0833333	0.526742	0.875003	-1.14425	0.977579
			CK-7d	-6.3500000000*	0.526742	1.08919e-15	-7.41091	-5.28909
			DS-7d	-2.3666666667*	0.526742	4.86868e-05	-3.42758	-1.30575
			MT+DS-7d	-4.2000000000*	0.526742	3.76667e-10	-5.26091	-3.13909
			CK-14d	-11.5500000000*	0.526742	1.1755e-25	-12.6109	-10.4891
			DS-14d	-4.2166666667*	0.526742	3.38765e-10	-5.27758	-3.15575
			MT+DS-14d	-9.2166666667*	0.526742	1.0585e-21	-10.2776	-8.15575
		DS-0d	CK-0d	0.0166667	0.526742	0.974898	-1.04425	1.07758
			MT+DS-0d	-0.0666667	0.526742	0.899849	-1.12758	0.994246
			CK-7d	-6.3333333333*	0.526742	1.19276e-15	-7.39425	-5.27242
			DS-7d	-2.3500000000*	0.526742	5.39332e-05	-3.41091	-1.28909
			MT+DS-7d	-4.1833333333*	0.526742	4.18843e-10	-5.24425	-3.12242
			CK-14d	-11.5333333333*	0.526742	1.2476e-25	-12.5942	-10.4724
			DS-14d	-4.2000000000*	0.526742	3.76667e-10	-5.26091	-3.13909
			MT+DS-14d	-9.2000000000*	0.526742	1.13663e-21	-10.2609	-8.13909
		MT+DS-0d	CK-0d	0.0833333	0.526742	0.875003	-0.977579	1.14425
			DS-0d	0.0666667	0.526742	0.899849	-0.994246	1.12758
			CK-7d	-6.2666666667*	0.526742	1.71756e-15	-7.32758	-5.20575
			DS-7d	-2.2833333333*	0.526742	8.10301e-05	-3.34425	-1.22242
			MT+DS-7d	-4.1166666667*	0.526742	6.40892e-10	-5.17758	-3.05575
			CK-14d	-11.4666666667*	0.526742	1.58418e-25	-12.5276	-10.4058
			DS-14d	-4.1333333333*	0.526742	5.76169e-10	-5.19425	-3.07242
			MT+DS-14d	-9.1333333333*	0.526742	1.51271e-21	-10.1942	-8.07242
		CK-7d	CK-0d	6.3500000000*	0.526742	1.08919e-15	5.28909	7.41091
			DS-0d	6.3333333333*	0.526742	1.19276e-15	5.27242	7.39425
			MT+DS-0d	6.2666666667*	0.526742	1.71756e-15	5.20575	7.32758
			DS-7d	3.9833333333*	0.526742	1.50605e-09	2.92242	5.04425
			MT+DS-7d	2.1500000000*	0.526742	0.000180733	1.08909	3.21091
			CK-14d	-5.2000000000*	0.526742	7.77335e-13	-6.26091	-4.13909
			DS-14d	2.1333333333*	0.526742	0.000199553	1.07242	3.19425
			MT+DS-14d	-2.8666666667*	0.526742	2.08326e-06	-3.92758	-1.80575
		DS-7d	CK-0d	2.3666666667*	0.526742	4.86868e-05	1.30575	3.42758
			DS-0d	2.3500000000*	0.526742	5.39332e-05	1.28909	3.41091
			MT+DS-0d	2.2833333333*	0.526742	8.10301e-05	1.22242	3.34425
			CK-7d	-3.9833333333*	0.526742	1.50605e-09	-5.04425	-2.92242
			MT+DS-7d	-1.8333333333*	0.526742	0.00112402	-2.89425	-0.772421
			CK-14d	-9.1833333333*	0.526742	1.22065e-21	-10.2442	-8.12242
			DS-14d	-1.8500000000*	0.526742	0.00102415	-2.91091	-0.789088
			MT+DS-14d	-6.8500000000*	0.526742	7.57502e-17	-7.91091	-5.78909
		MT+DS-7d	CK-0d	4.2000000000*	0.526742	3.76667e-10	3.13909	5.26091
			DS-0d	4.1833333333*	0.526742	4.18843e-10	3.12242	5.24425
			MT+DS-0d	4.1166666667*	0.526742	6.40892e-10	3.05575	5.17758
			CK-7d	-2.1500000000*	0.526742	0.000180733	-3.21091	-1.08909
			DS-7d	1.8333333333*	0.526742	0.00112402	0.772421	2.89425
			CK-14d	-7.3500000000*	0.526742	5.89476e-18	-8.41091	-6.28909
			DS-14d	-0.0166667	0.526742	0.974898	-1.07758	1.04425
			MT+DS-14d	-5.0166666667*	0.526742	2.34285e-12	-6.07758	-3.95575
		CK-14d	CK-0d	11.5500000000*	0.526742	1.1755e-25	10.4891	12.6109
			DS-0d	11.5333333333*	0.526742	1.2476e-25	10.4724	12.5942
			MT+DS-0d	11.4666666667*	0.526742	1.58418e-25	10.4058	12.5276
			CK-7d	5.2000000000*	0.526742	7.77335e-13	4.13909	6.26091
			DS-7d	9.1833333333*	0.526742	1.22065e-21	8.12242	10.2442
			MT+DS-7d	7.3500000000*	0.526742	5.89476e-18	6.28909	8.41091
			DS-14d	7.3333333333*	0.526742	6.40714e-18	6.27242	8.39425
			MT+DS-14d	2.3333333333*	0.526742	5.97316e-05	1.27242	3.39425
		DS-14d	CK-0d	4.2166666667*	0.526742	3.38765e-10	3.15575	5.27758
			DS-0d	4.2000000000*	0.526742	3.76667e-10	3.13909	5.26091
			MT+DS-0d	4.1333333333*	0.526742	5.76169e-10	3.07242	5.19425
			CK-7d	-2.1333333333*	0.526742	0.000199553	-3.19425	-1.07242
			DS-7d	1.8500000000*	0.526742	0.00102415	0.789088	2.91091
			MT+DS-7d	0.0166667	0.526742	0.974898	-1.04425	1.07758
			CK-14d	-7.3333333333*	0.526742	6.40714e-18	-8.39425	-6.27242
			MT+DS-14d	-5.0000000000*	0.526742	2.5919e-12	-6.06091	-3.93909
		MT+DS-14d	CK-0d	9.2166666667*	0.526742	1.0585e-21	8.15575	10.2776
			DS-0d	9.2000000000*	0.526742	1.13663e-21	8.13909	10.2609
			MT+DS-0d	9.1333333333*	0.526742	1.51271e-21	8.07242	10.1942
			CK-7d	2.8666666667*	0.526742	2.08326e-06	1.80575	3.92758
			DS-7d	6.8500000000*	0.526742	7.57502e-17	5.78909	7.91091
			MT+DS-7d	5.0166666667*	0.526742	2.34285e-12	3.95575	6.07758
			CK-14d	-2.3333333333*	0.526742	5.97316e-05	-3.39425	-1.27242
			DS-14d	5.0000000000*	0.526742	2.5919e-12	3.93909	6.06091
Leafarea	LSD	CK-0d	DS-0d	2.09375	15.4741	0.892973	-29.0726	33.2601
			MT+DS-0d	1.34375	15.4741	0.931185	-29.8226	32.5101
			CK-7d	-301.2887500000*	15.4741	1.49755e-23	-332.455	-270.122
			DS-7d	-184.1012500000*	15.4741	1.71578e-15	-215.268	-152.935
			MT+DS-7d	-228.1787500000*	15.4741	7.60243e-19	-259.345	-197.012
			CK-14d	-500.9775000000*	15.4741	8.10148e-33	-532.144	-469.811
			DS-14d	-316.8575000000*	15.4741	1.94318e-24	-348.024	-285.691
			MT+DS-14d	-435.0312500000*	15.4741	3.46264e-30	-466.198	-403.865
		DS-0d	CK-0d	-2.09375	15.4741	0.892973	-33.2601	29.0726
			MT+DS-0d	-0.75	15.4741	0.961558	-31.9164	30.4164
			CK-7d	-303.3825000000*	15.4741	1.13242e-23	-334.549	-272.216
			DS-7d	-186.1950000000*	15.4741	1.16198e-15	-217.361	-155.029
			MT+DS-7d	-230.2725000000*	15.4741	5.39733e-19	-261.439	-199.106
			CK-14d	-503.0712500000*	15.4741	6.76594e-33	-534.238	-471.905
			DS-14d	-318.9512500000*	15.4741	1.48572e-24	-350.118	-287.785
			MT+DS-14d	-437.1250000000*	15.4741	2.82162e-30	-468.291	-405.959
		MT+DS-0d	CK-0d	-1.34375	15.4741	0.931185	-32.5101	29.8226
			DS-0d	0.75	15.4741	0.961558	-30.4164	31.9164
			CK-7d	-302.6325000000*	15.4741	1.25144e-23	-333.799	-271.466
			DS-7d	-185.4450000000*	15.4741	1.33571e-15	-216.611	-154.279
			MT+DS-7d	-229.5225000000*	15.4741	6.10052e-19	-260.689	-198.356
			CK-14d	-502.3212500000*	15.4741	7.21637e-33	-533.488	-471.155
			DS-14d	-318.2012500000*	15.4741	1.6354e-24	-349.368	-287.035
			MT+DS-14d	-436.3750000000*	15.4741	3.036e-30	-467.541	-405.209
		CK-7d	CK-0d	301.2887500000*	15.4741	1.49755e-23	270.122	332.455
			DS-0d	303.3825000000*	15.4741	1.13242e-23	272.216	334.549
			MT+DS-0d	302.6325000000*	15.4741	1.25144e-23	271.466	333.799
			DS-7d	117.1875000000*	15.4741	1.45134e-09	86.0211	148.354
			MT+DS-7d	73.1100000000*	15.4741	2.28705e-05	41.9436	104.276
			CK-14d	-199.6887500000*	15.4741	9.97049e-17	-230.855	-168.522
			DS-14d	-15.5687	15.4741	0.319738	-46.7351	15.5976
			MT+DS-14d	-133.7425000000*	15.4741	4.07324e-11	-164.909	-102.576
		DS-7d	CK-0d	184.1012500000*	15.4741	1.71578e-15	152.935	215.268
			DS-0d	186.1950000000*	15.4741	1.16198e-15	155.029	217.361
			MT+DS-0d	185.4450000000*	15.4741	1.33571e-15	154.279	216.611
			CK-7d	-117.1875000000*	15.4741	1.45134e-09	-148.354	-86.0211
			MT+DS-7d	-44.0775000000*	15.4741	0.00660057	-75.2439	-12.9111
			CK-14d	-316.8762500000*	15.4741	1.9385e-24	-348.043	-285.71
			DS-14d	-132.7562500000*	15.4741	5.02454e-11	-163.923	-101.59
			MT+DS-14d	-250.9300000000*	15.4741	2.04974e-20	-282.096	-219.764
		MT+DS-7d	CK-0d	228.1787500000*	15.4741	7.60243e-19	197.012	259.345
			DS-0d	230.2725000000*	15.4741	5.39733e-19	199.106	261.439
			MT+DS-0d	229.5225000000*	15.4741	6.10052e-19	198.356	260.689
			CK-7d	-73.1100000000*	15.4741	2.28705e-05	-104.276	-41.9436
			DS-7d	44.0775000000*	15.4741	0.00660057	12.9111	75.2439
			CK-14d	-272.7987500000*	15.4741	7.87438e-22	-303.965	-241.632
			DS-14d	-88.6787500000*	15.4741	7.82345e-07	-119.845	-57.5124
			MT+DS-14d	-206.8525000000*	15.4741	2.8146e-17	-238.019	-175.686
		CK-14d	CK-0d	500.9775000000*	15.4741	8.10148e-33	469.811	532.144
			DS-0d	503.0712500000*	15.4741	6.76594e-33	471.905	534.238
			MT+DS-0d	502.3212500000*	15.4741	7.21637e-33	471.155	533.488
			CK-7d	199.6887500000*	15.4741	9.97049e-17	168.522	230.855
			DS-7d	316.8762500000*	15.4741	1.9385e-24	285.71	348.043
			MT+DS-7d	272.7987500000*	15.4741	7.87438e-22	241.632	303.965
			DS-14d	184.1200000000*	15.4741	1.70978e-15	152.954	215.286
			MT+DS-14d	65.9462500000*	15.4741	0.000102329	34.7799	97.1126
		DS-14d	CK-0d	316.8575000000*	15.4741	1.94318e-24	285.691	348.024
			DS-0d	318.9512500000*	15.4741	1.48572e-24	287.785	350.118
			MT+DS-0d	318.2012500000*	15.4741	1.6354e-24	287.035	349.368
			CK-7d	15.5687	15.4741	0.319738	-15.5976	46.7351
			DS-7d	132.7562500000*	15.4741	5.02454e-11	101.59	163.923
			MT+DS-7d	88.6787500000*	15.4741	7.82345e-07	57.5124	119.845
			CK-14d	-184.1200000000*	15.4741	1.70978e-15	-215.286	-152.954
			MT+DS-14d	-118.1737500000*	15.4741	1.16997e-09	-149.34	-87.0074
		MT+DS-14d	CK-0d	435.0312500000*	15.4741	3.46264e-30	403.865	466.198
			DS-0d	437.1250000000*	15.4741	2.82162e-30	405.959	468.291
			MT+DS-0d	436.3750000000*	15.4741	3.036e-30	405.209	467.541
			CK-7d	133.7425000000*	15.4741	4.07324e-11	102.576	164.909
			DS-7d	250.9300000000*	15.4741	2.04974e-20	219.764	282.096
			MT+DS-7d	206.8525000000*	15.4741	2.8146e-17	175.686	238.019
			CK-14d	-65.9462500000*	15.4741	0.000102329	-97.1126	-34.7799
			DS-14d	118.1737500000*	15.4741	1.16997e-09	87.0074	149.34
SPAD	LSD	CK-0d	DS-0d	0.3	0.784652	0.704013	-1.28037	1.88037
			MT+DS-0d	0.266667	0.784652	0.735548	-1.3137	1.84704
			CK-7d	-0.4	0.784652	0.612697	-1.98037	1.18037
			DS-7d	1.8500000000*	0.784652	0.0227945	0.269629	3.43037
			MT+DS-7d	0.583333	0.784652	0.461086	-0.997037	2.1637
			CK-14d	-1.18333	0.784652	0.138518	-2.7637	0.397037
			DS-14d	4.2666666667*	0.784652	2.11599e-06	2.6863	5.84704
			MT+DS-14d	1.8333333333*	0.784652	0.0239779	0.252963	3.4137
		DS-0d	CK-0d	-0.3	0.784652	0.704013	-1.88037	1.28037
			MT+DS-0d	-0.0333333	0.784652	0.966303	-1.6137	1.54704
			CK-7d	-0.7	0.784652	0.377077	-2.28037	0.880371
			DS-7d	1.55	0.784652	0.0543755	-0.0303706	3.13037
			MT+DS-7d	0.283333	0.784652	0.719719	-1.29704	1.8637
			CK-14d	-1.48333	0.784652	0.06515	-3.0637	0.0970372
			DS-14d	3.9666666667*	0.784652	7.64985e-06	2.3863	5.54704
			MT+DS-14d	1.53333	0.784652	0.0569142	-0.0470372	3.1137
		MT+DS-0d	CK-0d	-0.266667	0.784652	0.735548	-1.84704	1.3137
			DS-0d	0.0333333	0.784652	0.966303	-1.54704	1.6137
			CK-7d	-0.666667	0.784652	0.400027	-2.24704	0.913704
			DS-7d	1.5833333333*	0.784652	0.0495899	0.00296276	3.1637
			MT+DS-7d	0.316667	0.784652	0.688436	-1.2637	1.89704
			CK-14d	-1.45	0.784652	0.071188	-3.03037	0.130371
			DS-14d	4.0000000000*	0.784652	6.63774e-06	2.41963	5.58037
			MT+DS-14d	1.56667	0.784652	0.0519351	-0.0137039	3.14704
		CK-7d	CK-0d	0.4	0.784652	0.612697	-1.18037	1.98037
			DS-0d	0.7	0.784652	0.377077	-0.880371	2.28037
			MT+DS-0d	0.666667	0.784652	0.400027	-0.913704	2.24704
			DS-7d	2.2500000000*	0.784652	0.00627465	0.669629	3.83037
			MT+DS-7d	0.983333	0.784652	0.216602	-0.597037	2.5637
			CK-14d	-0.783333	0.784652	0.323463	-2.3637	0.797037
			DS-14d	4.6666666667*	0.784652	3.73675e-07	3.0863	6.24704
			MT+DS-14d	2.2333333333*	0.784652	0.00663926	0.652963	3.8137
		DS-7d	CK-0d	-1.8500000000*	0.784652	0.0227945	-3.43037	-0.269629
			DS-0d	-1.55	0.784652	0.0543755	-3.13037	0.0303706
			MT+DS-0d	-1.5833333333*	0.784652	0.0495899	-3.1637	-0.00296276
			CK-7d	-2.2500000000*	0.784652	0.00627465	-3.83037	-0.669629
			MT+DS-7d	-1.26667	0.784652	0.113453	-2.84704	0.313704
			CK-14d	-3.0333333333*	0.784652	0.000353163	-4.6137	-1.45296
			DS-14d	2.4166666667*	0.784652	0.00352423	0.836296	3.99704
			MT+DS-14d	-0.0166667	0.784652	0.983147	-1.59704	1.5637
		MT+DS-7d	CK-0d	-0.583333	0.784652	0.461086	-2.1637	0.997037
			DS-0d	-0.283333	0.784652	0.719719	-1.8637	1.29704
			MT+DS-0d	-0.316667	0.784652	0.688436	-1.89704	1.2637
			CK-7d	-0.983333	0.784652	0.216602	-2.5637	0.597037
			DS-7d	1.26667	0.784652	0.113453	-0.313704	2.84704
			CK-14d	-1.7666666667*	0.784652	0.0292809	-3.34704	-0.186296
			DS-14d	3.6833333333*	0.784652	2.5274e-05	2.10296	5.2637
			MT+DS-14d	1.25	0.784652	0.118147	-0.330371	2.83037
		CK-14d	CK-0d	1.18333	0.784652	0.138518	-0.397037	2.7637
			DS-0d	1.48333	0.784652	0.06515	-0.0970372	3.0637
			MT+DS-0d	1.45	0.784652	0.071188	-0.130371	3.03037
			CK-7d	0.783333	0.784652	0.323463	-0.797037	2.3637
			DS-7d	3.0333333333*	0.784652	0.000353163	1.45296	4.6137
			MT+DS-7d	1.7666666667*	0.784652	0.0292809	0.186296	3.34704
			DS-14d	5.4500000000*	0.784652	1.2264e-08	3.86963	7.03037
			MT+DS-14d	3.0166666667*	0.784652	0.000376935	1.4363	4.59704
		DS-14d	CK-0d	-4.2666666667*	0.784652	2.11599e-06	-5.84704	-2.6863
			DS-0d	-3.9666666667*	0.784652	7.64985e-06	-5.54704	-2.3863
			MT+DS-0d	-4.0000000000*	0.784652	6.63774e-06	-5.58037	-2.41963
			CK-7d	-4.6666666667*	0.784652	3.73675e-07	-6.24704	-3.0863
			DS-7d	-2.4166666667*	0.784652	0.00352423	-3.99704	-0.836296
			MT+DS-7d	-3.6833333333*	0.784652	2.5274e-05	-5.2637	-2.10296
			CK-14d	-5.4500000000*	0.784652	1.2264e-08	-7.03037	-3.86963
			MT+DS-14d	-2.4333333333*	0.784652	0.00332281	-4.0137	-0.852963
		MT+DS-14d	CK-0d	-1.8333333333*	0.784652	0.0239779	-3.4137	-0.252963
			DS-0d	-1.53333	0.784652	0.0569142	-3.1137	0.0470372
			MT+DS-0d	-1.56667	0.784652	0.0519351	-3.14704	0.0137039
			CK-7d	-2.2333333333*	0.784652	0.00663926	-3.8137	-0.652963
			DS-7d	0.0166667	0.784652	0.983147	-1.5637	1.59704
			MT+DS-7d	-1.25	0.784652	0.118147	-2.83037	0.330371
			CK-14d	-3.0166666667*	0.784652	0.000376935	-4.59704	-1.4363
			DS-14d	2.4333333333*	0.784652	0.00332281	0.852963	4.0137
*. The mean difference is significant at the 0.05 level.
Homogeneous Subsets
Plantheight
Treatment		N	Subset for alpha = 0.05
			1	2	3	4	5	6
Student-Newman-Keulsa	CK-0d	6	25.7
	DS-0d	6	25.7167
	MT+DS-0d	6	25.7833
	DS-7d	6		28.0667
	MT+DS-7d	6			29.9
	DS-14d	6			29.9167
	CK-7d	6				32.05
	MT+DS-14d	6					34.9167
	CK-14d	6						37.25
	Sig.		0.986301	1	0.974898	1	1	1
Duncana	CK-0d	6	25.7
	DS-0d	6	25.7167
	MT+DS-0d	6	25.7833
	DS-7d	6		28.0667
	MT+DS-7d	6			29.9
	DS-14d	6			29.9167
	CK-7d	6				32.05
	MT+DS-14d	6					34.9167
	CK-14d	6						37.25
	Sig.		0.882955	1	0.974898	1	1	1
Means for groups in homogeneous subsets are displayed.
a. Uses Harmonic Mean Sample Size = 6.000.
Leafarea
Treatment		N	Subset for alpha = 0.05
			1	2	3	4	5	6
Student-Newman-Keulsa	DS-0d	6	248.594
	MT+DS-0d	6	249.344
	CK-0d	6	250.688
	DS-7d	6		434.789
	MT+DS-7d	6			478.866
	CK-7d	6				551.976
	DS-14d	6				567.545
	MT+DS-14d	6					685.719
	CK-14d	6						751.665
	Sig.		0.98996	1	1	0.319738	1	1
Duncana	DS-0d	6	248.594
	MT+DS-0d	6	249.344
	CK-0d	6	250.688
	DS-7d	6		434.789
	MT+DS-7d	6			478.866
	CK-7d	6				551.976
	DS-14d	6				567.545
	MT+DS-14d	6					685.719
	CK-14d	6						751.665
	Sig.		0.899799	1	1	0.319738	1	1
Means for groups in homogeneous subsets are displayed.
a. Uses Harmonic Mean Sample Size = 6.000.
SPAD
Treatment		N	Subset for alpha = 0.05
			1	2	3
Student-Newman-Keulsa	DS-14d	6	44.6833
	DS-7d	6		47.1
	MT+DS-14d	6		47.1167
	MT+DS-7d	6		48.3667	48.3667
	DS-0d	6		48.65	48.65
	MT+DS-0d	6		48.6833	48.6833
	CK-0d	6		48.95	48.95
	CK-7d	6		49.35	49.35
	CK-14d	6			50.1333
	Sig.		1	0.083954	0.235391
Duncana	DS-14d	6	44.6833
	DS-7d	6		47.1
	MT+DS-14d	6		47.1167
	MT+DS-7d	6		48.3667	48.3667
	DS-0d	6		48.65	48.65
	MT+DS-0d	6		48.6833	48.6833
	CK-0d	6			48.95
	CK-7d	6			49.35
	CK-14d	6			50.1333
	Sig.		1	0.0770102	0.0522629
Means for groups in homogeneous subsets are displayed.
a. Uses Harmonic Mean Sample Size = 6.000.
GET
ONEWAY Stemdiameter BY Treatment
/STATISTICS DESCRIPTIVES EFFECTS HOMOGENEITY
/MISSING ANALYSIS
/POSTHOC=SNK DUNCAN ALPHA(0.05).
Oneway
Notes
Output Created		19-MAR-2023 11:29:08
Comments
Input	Data	D:\desktop\paper2\spss\2P.sav
	Active Dataset	date1
	Filter	<none>
	Weight	<none>
	Split File	<none>
	N of Rows in Working Data File	72
Missing Value Handling	Definition of Missing	User-defined missing values are treated as missing.
	Cases Used	Statistics for each analysis are based on cases with no missing data for any variable in the analysis.
Syntax		ONEWAY Stemdiameter BY Treatment /STATISTICS DESCRIPTIVES EFFECTS HOMOGENEITY /MISSING ANALYSIS /POSTHOC=SNK DUNCAN ALPHA(0.05).
Resources	Processor Time	00:00:00.11
	Elapsed Time	00:00:00.10
[date1] D:\desktop\paper2\spss\2P.sav
Descriptives
Stemdiameter
		N	Mean	Std. Deviation	Std. Error	95% Confidence Interval for Mean		Minimum	Maximum	Between- Component Variance
						Lower Bound	Upper Bound
CK-0d		8	4.1475	0.100818	0.0356446	4.06321	4.23179	4.01	4.28
DS-0d		8	4.095	0.0861892	0.0304725	4.02294	4.16706	3.98	4.21
MT+DS-0d		8	4.12125	0.144661	0.0511454	4.00031	4.24219	3.89	4.33
CK-7d		8	5.19375	0.154821	0.0547376	5.06432	5.32318	4.92	5.37
DS-7d		8	4.54125	0.174964	0.0618592	4.39498	4.68752	4.35	4.85
MT+DS-7d		8	4.845	0.178885	0.0632456	4.69545	4.99455	4.57	5.07
CK-14d		8	5.81625	0.17054	0.060295	5.67367	5.95883	5.54	6.03
DS-14d		8	4.865	0.0690755	0.0244219	4.80725	4.92275	4.77	4.96
MT+DS-14d		8	5.045	0.180713	0.0638916	4.89392	5.19608	4.82	5.37
Total		72	4.74111	0.565781	0.066678	4.60816	4.87406	3.89	6.03
Model	Fixed Effects			0.145913	0.017196	4.70675	4.77547
	Random Effects				0.192689	4.29677	5.18545			0.331501
Test of Homogeneity of Variances
		Levene Statistic	df1	df2	Sig.
Stemdiameter	Based on Mean	1.60375	8	63	0.141734
	Based on Median	1.32663	8	63	0.247023
	Based on Median and with adjusted df	1.32663	8	48.4116	0.253221
	Based on trimmed mean	1.59476	8	63	0.144395
ANOVA
Stemdiameter
	Sum of Squares	df	Mean Square	F	Sig.
Between Groups	21.3864	8	2.6733	125.563	1.01256e-35
Within Groups	1.3413	63	0.0212905
Total	22.7277	71
Post Hoc Tests
Homogeneous Subsets
Stemdiameter
Treatment		N	Subset for alpha = 0.05
			1	2	3	4	5	6
Student-Newman-Keulsa	DS-0d	8	4.095
	MT+DS-0d	8	4.12125
	CK-0d	8	4.1475
	DS-7d	8		4.54125
	MT+DS-7d	8			4.845
	DS-14d	8			4.865
	MT+DS-14d	8				5.045
	CK-7d	8					5.19375
	CK-14d	8						5.81625
	Sig.		0.752843	1	0.784876	1	1	1
Duncana	DS-0d	8	4.095
	MT+DS-0d	8	4.12125
	CK-0d	8	4.1475
	DS-7d	8		4.54125
	MT+DS-7d	8			4.845
	DS-14d	8			4.865
	MT+DS-14d	8				5.045
	CK-7d	8					5.19375
	CK-14d	8						5.81625
	Sig.		0.502851	1	0.784876	1	1	1
Means for groups in homogeneous subsets are displayed.
a. Uses Harmonic Mean Sample Size = 8.000.
ONEWAY FreshShootWeight FreshRootWeight DryShootWeight DryRootWeight BY Treatment
/STATISTICS DESCRIPTIVES EFFECTS HOMOGENEITY
/MISSING ANALYSIS
/POSTHOC=SNK DUNCAN ALPHA(0.05).
Oneway
Notes
Output Created		19-MAR-2023 11:30:40
Comments
Input	Data	D:\desktop\paper2\spss\5P.sav
	Active Dataset	date5
	Filter	<none>
	Weight	<none>
	Split File	<none>
	N of Rows in Working Data File	18
Missing Value Handling	Definition of Missing	User-defined missing values are treated as missing.
	Cases Used	Statistics for each analysis are based on cases with no missing data for any variable in the analysis.
Syntax		ONEWAY FreshShootWeight FreshRootWeight DryShootWeight DryRootWeight BY Treatment /STATISTICS DESCRIPTIVES EFFECTS HOMOGENEITY /MISSING ANALYSIS /POSTHOC=SNK DUNCAN ALPHA(0.05).
Resources	Processor Time	00:00:00.03
	Elapsed Time	00:00:00.04
[date5] D:\desktop\paper2\spss\5P.sav
Descriptives
			N	Mean	Std. Deviation	Std. Error	95% Confidence Interval for Mean		Minimum	Maximum	Between- Component Variance
							Lower Bound	Upper Bound
FreshShootWeight	CK		6	36.3533	1.44119	0.588363	34.8409	37.8658	34.78	38.78
	DS		6	20.5183	0.627676	0.256247	19.8596	21.177	19.45	21.22
	MT+DS		6	25.5033	0.999333	0.407976	24.4546	26.5521	24.37	26.86
	Total		18	27.4583	6.87702	1.62093	24.0385	30.8782	19.45	38.78
	Model	Fixed Effects			1.07543	0.253482	26.918	27.9986
		Random Effects				4.67452	7.34551	47.5712			65.3606
FreshRootWeight	CK		6	5.64417	0.246141	0.100487	5.38586	5.90248	5.313	5.932
	DS		6	2.76567	0.140492	0.0573554	2.61823	2.9131	2.537	2.894
	MT+DS		6	4.1525	0.250729	0.10236	3.88938	4.41562	3.812	4.497
	Total		18	4.18744	1.22677	0.289151	3.57739	4.7975	2.537	5.932
	Model	Fixed Effects			0.218471	0.051494	4.07769	4.2972
		Random Effects				0.831135	0.611359	7.76353			2.0644
DryShootWeight	CK		6	5.66483	0.0597241	0.0243823	5.60216	5.72751	5.607	5.767
	DS		6	4.28267	0.056532	0.0230791	4.22334	4.34199	4.223	4.376
	MT+DS		6	4.6955	0.061692	0.0251856	4.63076	4.76024	4.617	4.783
	Total		18	4.881	0.598709	0.141117	4.58327	5.17873	4.223	5.767
	Model	Fixed Effects			0.0593541	0.0139899	4.85118	4.91082
		Random Effects				0.409636	3.11848	6.64352			0.502817
DryRootWeight	CK		6	0.87	0.0156971	0.00640833	0.853527	0.886473	0.854	0.893
	DS		6	0.5825	0.0127554	0.00520737	0.569114	0.595886	0.563	0.598
	MT+DS		6	0.654	0.0231171	0.00943751	0.62974	0.67826	0.625	0.685
	Total		18	0.702167	0.126855	0.0299	0.639083	0.76525	0.563	0.893
	Model	Fixed Effects			0.0177341	0.00417998	0.693257	0.711076
		Random Effects				0.0864178	0.330341	1.07399			0.0223517
Test of Homogeneity of Variances
		Levene Statistic	df1	df2	Sig.
FreshShootWeight	Based on Mean	1.4606	2	15	0.263288
	Based on Median	1.29403	2	15	0.303076
	Based on Median and with adjusted df	1.29403	2	9.03903	0.320476
	Based on trimmed mean	1.39667	2	15	0.277814
FreshRootWeight	Based on Mean	0.71195	2	15	0.506538
	Based on Median	0.790262	2	15	0.471734
	Based on Median and with adjusted df	0.790262	2	14.2978	0.472576
	Based on trimmed mean	0.724122	2	15	0.500942
DryShootWeight	Based on Mean	0.0541311	2	15	0.947492
	Based on Median	0.0771941	2	15	0.926075
	Based on Median and with adjusted df	0.0771941	2	13.9876	0.926102
	Based on trimmed mean	0.05734	2	15	0.944479
DryRootWeight	Based on Mean	1.13812	2	15	0.346591
	Based on Median	1.05218	2	15	0.37358
	Based on Median and with adjusted df	1.05218	2	12.1119	0.379027
	Based on trimmed mean	1.13703	2	15	0.346917
ANOVA
		Sum of Squares	df	Mean Square	F	Sig.
FreshShootWeight	Between Groups	786.64	2	393.32	340.078	3.19936e-13
	Within Groups	17.3483	15	1.15656
	Total	803.988	17
FreshRootWeight	Between Groups	24.8683	2	12.4341	260.513	2.24797e-12
	Within Groups	0.715942	15	0.0477294
	Total	25.5842	17
DryShootWeight	Between Groups	6.04085	2	3.02042	857.366	3.43435e-16
	Within Groups	0.0528437	15	0.00352291
	Total	6.09369	17
DryRootWeight	Between Groups	0.268849	2	0.134425	427.423	5.9548e-14
	Within Groups	0.0047175	15	0.0003145
	Total	0.273567	17
Post Hoc Tests
Homogeneous Subsets
FreshShootWeight
Treatment		N	Subset for alpha = 0.05
			1	2	3
Student-Newman-Keulsa	DS	6	20.5183
	MT+DS	6		25.5033
	CK	6			36.3533
	Sig.		1	1	1
Duncana	DS	6	20.5183
	MT+DS	6		25.5033
	CK	6			36.3533
	Sig.		1	1	1
Means for groups in homogeneous subsets are displayed.
a. Uses Harmonic Mean Sample Size = 6.000.
FreshRootWeight
Treatment		N	Subset for alpha = 0.05
			1	2	3
Student-Newman-Keulsa	DS	6	2.76567
	MT+DS	6		4.1525
	CK	6			5.64417
	Sig.		1	1	1
Duncana	DS	6	2.76567
	MT+DS	6		4.1525
	CK	6			5.64417
	Sig.		1	1	1
Means for groups in homogeneous subsets are displayed.
a. Uses Harmonic Mean Sample Size = 6.000.
DryShootWeight
Treatment		N	Subset for alpha = 0.05
			1	2	3
Student-Newman-Keulsa	DS	6	4.28267
	MT+DS	6		4.6955
	CK	6			5.66483
	Sig.		1	1	1
Duncana	DS	6	4.28267
	MT+DS	6		4.6955
	CK	6			5.66483
	Sig.		1	1	1
Means for groups in homogeneous subsets are displayed.
a. Uses Harmonic Mean Sample Size = 6.000.
DryRootWeight
Treatment		N	Subset for alpha = 0.05
			1	2	3
Student-Newman-Keulsa	DS	6	0.5825
	MT+DS	6		0.654
	CK	6			0.87
	Sig.		1	1	1
Duncana	DS	6	0.5825
	MT+DS	6		0.654
	CK	6			0.87
	Sig.		1	1	1
Means for groups in homogeneous subsets are displayed.
a. Uses Harmonic Mean Sample Size = 6.000.
DATASET ACTIVATE date3.
ONEWAY RootLength RootSurfaceArea AverageRootDiameter RootVolume BY Treatment
/STATISTICS DESCRIPTIVES EFFECTS HOMOGENEITY
/MISSING ANALYSIS
/POSTHOC=SNK DUNCAN ALPHA(0.05).
Oneway
Notes
Output Created		19-MAR-2023 11:32:33
Comments
Input	Data	D:\desktop\paper2\spss\4P.sav
	Active Dataset	date3
	Filter	<none>
	Weight	<none>
	Split File	<none>
	N of Rows in Working Data File	9
Missing Value Handling	Definition of Missing	User-defined missing values are treated as missing.
	Cases Used	Statistics for each analysis are based on cases with no missing data for any variable in the analysis.
Syntax		ONEWAY RootLength RootSurfaceArea AverageRootDiameter RootVolume BY Treatment /STATISTICS DESCRIPTIVES EFFECTS HOMOGENEITY /MISSING ANALYSIS /POSTHOC=SNK DUNCAN ALPHA(0.05).
Resources	Processor Time	00:00:00.06
	Elapsed Time	00:00:00.05
[date3] D:\desktop\paper2\spss\4P.sav
Descriptives
			N	Mean	Std. Deviation	Std. Error	95% Confidence Interval for Mean		Minimum	Maximum	Between- Component Variance
							Lower Bound	Upper Bound
RootLength	CK		3	93.9538	3.15772	1.82311	86.1096	101.798	91.7825	97.5763
	DS		3	40.2336	0.871971	0.503433	38.0675	42.3997	39.5237	41.2069
	MT+DS		3	47.3038	2.97939	1.72015	39.9025	54.705	43.9696	49.7051
	Total		9	60.4971	25.3754	8.45847	40.9918	80.0023	39.5237	97.5763
	Model	Fixed Effects			2.55658	0.852194	58.4118	62.5823
		Random Effects				16.8524	-12.0131	133.007			849.834
RootSurfaceArea	CK		3	930.715	35.7646	20.6487	841.87	1019.56	901.578	970.629
	DS		3	385.413	15.3088	8.83852	347.384	423.442	367.892	396.202
	MT+DS		3	507.686	41.6384	24.0399	404.25	611.121	460.259	538.24
	Total		9	607.938	249.437	83.1458	416.203	799.672	367.892	970.629
	Model	Fixed Effects			32.9	10.9667	581.103	634.772
		Random Effects				165.203	-102.874	1318.75			81515.5
AverageRootDiameter	CK		3	0.318127	0.00673438	0.0038881	0.301398	0.334856	0.312257	0.325479
	DS		3	0.310966	0.00899513	0.00519334	0.288621	0.333311	0.301245	0.318995
	MT+DS		3	0.331202	0.0133415	0.00770269	0.29806	0.364344	0.315877	0.340225
	Total		9	0.320098	0.0124514	0.00415046	0.310527	0.329669	0.301245	0.340225
	Model	Fixed Effects			0.0100707	0.00335691	0.311884	0.328312
		Random Effects				0.00592442	0.294608	0.345589			7.14898e-05
RootVolume	CK		3	7.40833	0.325488	0.18792	6.59978	8.21689	7.052	7.69
	DS		3	3.056	0.128573	0.0742316	2.73661	3.37539	2.925	3.182
	MT+DS		3	4.318	0.401462	0.231784	3.32071	5.31529	3.856	4.582
	Total		9	4.92744	1.95745	0.652484	3.42281	6.43207	2.925	7.69
	Model	Fixed Effects			0.307487	0.102496	4.67665	5.17824
		Random Effects				1.29284	-0.635176	10.4901			4.98275
Test of Homogeneity of Variances
		Levene Statistic	df1	df2	Sig.
RootLength	Based on Mean	2.99906	2	6	0.125059
	Based on Median	0.439817	2	6	0.663373
	Based on Median and with adjusted df	0.439817	2	4.03534	0.671745
	Based on trimmed mean	2.626	2	6	0.151623
RootSurfaceArea	Based on Mean	2.0129	2	6	0.214337
	Based on Median	0.355054	2	6	0.714933
	Based on Median and with adjusted df	0.355054	2	4.38502	0.719589
	Based on trimmed mean	1.78687	2	6	0.246155
AverageRootDiameter	Based on Mean	1.37832	2	6	0.321693
	Based on Median	0.163921	2	6	0.852485
	Based on Median and with adjusted df	0.163921	2	3.52277	0.854929
	Based on trimmed mean	1.21069	2	6	0.361663
RootVolume	Based on Mean	2.52618	2	6	0.159988
	Based on Median	0.337454	2	6	0.726303
	Based on Median and with adjusted df	0.337454	2	3.452	0.734754
	Based on trimmed mean	2.22572	2	6	0.189202
ANOVA
		Sum of Squares	df	Mean Square	F	Sig.
RootLength	Between Groups	5112.08	2	2556.04	391.064	4.41228e-07
	Within Groups	39.2167	6	6.53611
	Total	5151.29	8
RootSurfaceArea	Between Groups	491258	2	245629	226.928	2.22119e-06
	Within Groups	6494.44	6	1082.41
	Total	497752	8
AverageRootDiameter	Between Groups	0.000631778	2	0.000315889	3.11467	0.118098
	Within Groups	0.000608517	6	0.00010142
	Total	0.0012403	8
RootVolume	Between Groups	30.0856	2	15.0428	159.102	6.33873e-06
	Within Groups	0.567291	6	0.0945484
	Total	30.6529	8
Post Hoc Tests
Homogeneous Subsets
RootLength
Treatment		N	Subset for alpha = 0.05
			1	2	3
Student-Newman-Keulsa	DS	3	40.2336
	MT+DS	3		47.3038
	CK	3			93.9538
	Sig.		1	1	1
Duncana	DS	3	40.2336
	MT+DS	3		47.3038
	CK	3			93.9538
	Sig.		1	1	1
Means for groups in homogeneous subsets are displayed.
a. Uses Harmonic Mean Sample Size = 3.000.
RootSurfaceArea
Treatment		N	Subset for alpha = 0.05
			1	2	3
Student-Newman-Keulsa	DS	3	385.413
	MT+DS	3		507.686
	CK	3			930.715
	Sig.		1	1	1
Duncana	DS	3	385.413
	MT+DS	3		507.686
	CK	3			930.715
	Sig.		1	1	1
Means for groups in homogeneous subsets are displayed.
a. Uses Harmonic Mean Sample Size = 3.000.
AverageRootDiameter
Treatment		N	Subset for alpha = 0.05
			1
Student-Newman-Keulsa	DS	3	0.310966
	CK	3	0.318127
	MT+DS	3	0.331202
	Sig.		0.10727
Duncana	DS	3	0.310966
	CK	3	0.318127
	MT+DS	3	0.331202
	Sig.		0.0551564
Means for groups in homogeneous subsets are displayed.
a. Uses Harmonic Mean Sample Size = 3.000.
RootVolume
Treatment		N	Subset for alpha = 0.05
			1	2	3
Student-Newman-Keulsa	DS	3	3.056
	MT+DS	3		4.318
	CK	3			7.40833
	Sig.		1	1	1
Duncana	DS	3	3.056
	MT+DS	3		4.318
	CK	3			7.40833
	Sig.		1	1	1
Means for groups in homogeneous subsets are displayed.
a. Uses Harmonic Mean Sample Size = 3.000.
DATASET ACTIVATE date0.
ONEWAY Pn Ci Gs Tr FvFm PSⅡ ETR NPQ BY Treatment
/POLYNOMIAL=1
/STATISTICS DESCRIPTIVES EFFECTS HOMOGENEITY
/MISSING ANALYSIS
/POSTHOC=SNK DUNCAN ALPHA(0.05).
Oneway
Notes
Output Created		19-MAR-2023 11:33:35
Comments
Input	Data	D:\desktop\paper2\spss\1P.sav
	Active Dataset	date0
	Filter	<none>
	Weight	<none>
	Split File	<none>
	N of Rows in Working Data File	54
Missing Value Handling	Definition of Missing	User-defined missing values are treated as missing.
	Cases Used	Statistics for each analysis are based on cases with no missing data for any variable in the analysis.
Syntax		ONEWAY Pn Ci Gs Tr FvFm PSⅡ ETR NPQ BY Treatment /POLYNOMIAL=1 /STATISTICS DESCRIPTIVES EFFECTS HOMOGENEITY /MISSING ANALYSIS /POSTHOC=SNK DUNCAN ALPHA(0.05).
Resources	Processor Time	00:00:00.52
	Elapsed Time	00:00:00.51
[date0] D:\desktop\paper2\spss\1P.sav
Descriptives
			N	Mean	Std. Deviation	Std. Error	95% Confidence Interval for Mean		Minimum	Maximum	Between- Component Variance
							Lower Bound	Upper Bound
Pn	CK-0d		6	7.63803	0.518434	0.21165	7.09397	8.18209	6.98162	8.46819
	DS-0d		6	7.63414	0.73645	0.300655	6.86129	8.407	6.45144	8.60676
	MT+DS-0d		6	7.56698	0.606227	0.247491	6.93079	8.20318	6.72121	8.38404
	CK-7d		6	10.3783	0.604532	0.246799	9.74391	11.0127	9.3946	11.066
	DS-7d		6	6.23553	0.588592	0.240292	5.61784	6.85322	5.58482	6.97743
	MT+DS-7d		6	7.71335	0.446443	0.182259	7.24483	8.18186	7.19002	8.34774
	CK-14d		6	11.3631	0.433605	0.177018	10.908	11.8181	10.9181	11.9747
	DS-14d		6	4.35066	0.556782	0.227305	3.76636	4.93497	3.87439	5.44067
	MT+DS-14d		6	6.45577	0.557331	0.227529	5.87088	7.04065	5.65394	7.21525
	Total		54	7.70398	2.07256	0.28204	7.13828	8.26969	3.87439	11.9747
	Model	Fixed Effects			0.567498	0.0772268	7.54844	7.85953
		Random Effects				0.702459	6.08411	9.32386			4.38736
Ci	CK-0d		6	211.416	8.90804	3.63669	202.067	220.764	199.255	223.791
	DS-0d		6	211.415	7.4442	3.03908	203.603	219.227	201.587	219.881
	MT+DS-0d		6	210.539	6.23113	2.54385	203.999	217.078	203.19	217.665
	CK-7d		6	275.286	9.84881	4.02076	264.95	285.622	261.973	288.206
	DS-7d		6	192.407	11.7786	4.8086	180.046	204.768	182.36	213.353
	MT+DS-7d		6	209.238	11.1346	4.54569	197.553	220.923	198.314	229.013
	CK-14d		6	280.113	3.52947	1.4409	276.409	283.817	275.683	285.775
	DS-14d		6	135.214	14.7635	6.02718	119.721	150.708	115.118	156.891
	MT+DS-14d		6	159.281	9.79267	3.99784	149.004	169.557	140.941	166.578
	Total		54	209.434	45.6046	6.206	196.987	221.882	115.118	288.206
	Model	Fixed Effects			9.77312	1.32995	206.756	212.113
		Random Effects				15.6591	173.324	245.544			2190.96
Gs	CK-0d		6	0.0794202	0.00951066	0.00388271	0.0694393	0.089401	0.067446	0.094139
	DS-0d		6	0.0786003	0.0105962	0.00432588	0.0674803	0.0897204	0.061911	0.090996
	MT+DS-0d		6	0.0800248	0.010823	0.00441845	0.0686668	0.0913828	0.065959	0.090996
	CK-7d		6	0.175583	0.0222937	0.00910136	0.152188	0.198979	0.148082	0.205871
	DS-7d		6	0.0542299	0.00800459	0.00326786	0.0458296	0.0626302	0.0477234	0.0683193
	MT+DS-7d		6	0.074646	0.00771681	0.00315037	0.0665477	0.0827443	0.0672512	0.0872106
	CK-14d		6	0.207685	0.00995718	0.004065	0.197235	0.218134	0.194165	0.222414
	DS-14d		6	0.029305	0.00581976	0.00237591	0.0231975	0.0354125	0.024247	0.039172
	MT+DS-14d		6	0.0475417	0.0050523	0.00206259	0.0422396	0.0528437	0.041015	0.054959
	Total		54	0.0918929	0.0576925	0.00785095	0.0761459	0.10764	0.024247	0.222414
	Model	Fixed Effects			0.0110506	0.00150379	0.0888641	0.0949217
		Random Effects				0.0198904	0.0460256	0.13776			0.0035403
Tr	CK-0d		6	1.78534	0.0795377	0.0324711	1.70187	1.86881	1.68622	1.8977
	DS-0d		6	1.7904	0.114404	0.0467051	1.67034	1.91046	1.65993	1.9471
	MT+DS-0d		6	1.7916	0.113918	0.0465069	1.67205	1.91115	1.62616	1.9471
	CK-7d		6	4.27232	0.549114	0.224175	3.69606	4.84858	3.57383	5.14737
	DS-7d		6	1.44748	0.214092	0.0874027	1.22281	1.67216	1.2681	1.79874
	MT+DS-7d		6	1.9232	0.191173	0.0780462	1.72257	2.12382	1.72742	2.13033
	CK-14d		6	5.05399	0.167297	0.0682986	4.87842	5.22955	4.83163	5.31871
	DS-14d		6	0.841122	0.145903	0.0595646	0.688006	0.994238	0.718937	1.10028
	MT+DS-14d		6	1.37673	0.159982	0.0653123	1.20884	1.54462	1.18724	1.61609
	Total		54	2.25358	1.36659	0.18597	1.88057	2.62658	0.718937	5.31871
	Model	Fixed Effects			0.233612	0.0317905	2.18955	2.31761
		Random Effects				0.472694	1.16354	3.34361			2.00186
FvFm	CK-0d		6	0.792051	0.00634648	0.00259094	0.785391	0.798711	0.783607	0.802439
	DS-0d		6	0.793055	0.00804716	0.00328524	0.78461	0.8015	0.781955	0.802616
	MT+DS-0d		6	0.794439	0.00720655	0.00294206	0.786877	0.802002	0.784363	0.802548
	CK-7d		6	0.792689	0.00325664	0.00132952	0.789271	0.796106	0.787443	0.795655
	DS-7d		6	0.778112	0.00925432	0.00377806	0.768401	0.787824	0.762509	0.787129
	MT+DS-7d		6	0.786008	0.0057036	0.00232849	0.780022	0.791993	0.779424	0.793309
	CK-14d		6	0.79381	0.00681476	0.00278211	0.786658	0.800962	0.785147	0.804398
	DS-14d		6	0.768405	0.0108611	0.00443404	0.757007	0.779803	0.75422	0.783462
	MT+DS-14d		6	0.782396	0.00506691	0.00206856	0.777079	0.787713	0.776639	0.79082
	Total		54	0.786774	0.0108467	0.00147605	0.783813	0.789735	0.75422	0.804398
	Model	Fixed Effects			0.00727115	0.000989478	0.784781	0.788767
		Random Effects				0.00298778	0.779884	0.793664			7.15298e-05
PSⅡ	CK-0d		6	0.629833	0.0305117	0.0124564	0.597813	0.661853	0.604	0.689
	DS-0d		6	0.64	0.0217991	0.00889944	0.617123	0.662877	0.615	0.67
	MT+DS-0d		6	0.639667	0.0308264	0.0125848	0.607316	0.672017	0.607	0.677
	CK-7d		6	0.652	0.0565862	0.0231012	0.592616	0.711384	0.548	0.71
	DS-7d		6	0.518167	0.033217	0.0135608	0.483308	0.553026	0.49	0.581
	MT+DS-7d		6	0.549	0.0338821	0.0138323	0.513443	0.584557	0.524	0.615
	CK-14d		6	0.640833	0.0454155	0.0185408	0.593173	0.688494	0.568	0.683
	DS-14d		6	0.487667	0.0547893	0.0223676	0.430169	0.545165	0.407	0.55
	MT+DS-14d		6	0.5505	0.0328375	0.0134058	0.516039	0.584961	0.505	0.603
	Total		54	0.589741	0.07016	0.00954756	0.570591	0.608891	0.407	0.71
	Model	Fixed Effects			0.0393736	0.00535807	0.578949	0.600532
		Random Effects				0.0210338	0.541237	0.638245			0.00372341
ETR	CK-0d		6	109.5	5.39444	2.20227	103.839	115.161	105	120
	DS-0d		6	111.333	3.61478	1.47573	107.54	115.127	107	116
	MT+DS-0d		6	111.5	5.24404	2.14087	105.997	117.003	106	118
	CK-7d		6	114.333	10.0731	4.11231	103.762	124.904	96	125
	DS-7d		6	91	5.86515	2.39444	84.8449	97.1551	86	102
	MT+DS-7d		6	96.5	5.95819	2.43242	90.2473	102.753	92	108
	CK-14d		6	112.667	7.94145	3.24208	104.333	121.001	100	120
	DS-14d		6	85.5	9.62808	3.93065	75.3959	95.6041	71	96
	MT+DS-14d		6	96.6667	5.68038	2.319	90.7055	102.628	89	106
	Total		54	103.222	12.1106	1.64804	99.9167	106.528	71	125
	Model	Fixed Effects			6.90464	0.939603	101.33	105.115
		Random Effects				3.6094	94.8989	111.546			109.304
NPQ	CK-0d		6	0.267859	0.0693508	0.0283123	0.19508	0.340638	0.168091	0.355072
	DS-0d		6	0.274764	0.133551	0.0545218	0.134611	0.414917	0.143038	0.482443
	MT+DS-0d		6	0.294981	0.110513	0.0451169	0.179004	0.410957	0.171642	0.46851
	CK-7d		6	0.235289	0.109837	0.0448407	0.120023	0.350556	0.086957	0.373134
	DS-7d		6	0.324126	0.155762	0.0635894	0.160664	0.487588	0.14511	0.576923
	MT+DS-7d		6	0.24861	0.114824	0.0468766	0.12811	0.369111	0.153785	0.471311
	CK-14d		6	0.201057	0.0919299	0.0375302	0.104583	0.297532	0.111261	0.364641
	DS-14d		6	0.481268	0.136414	0.0556907	0.338111	0.624426	0.351064	0.64831
	MT+DS-14d		6	0.277658	0.0846595	0.0345621	0.188813	0.366503	0.164768	0.390338
	Total		54	0.289513	0.130352	0.0177386	0.253933	0.325092	0.086957	0.64831
	Model	Fixed Effects			0.114793	0.0156213	0.25805	0.320975
		Random Effects				0.026683	0.227981	0.351044			0.00421162
Test of Homogeneity of Variances
		Levene Statistic	df1	df2	Sig.
Pn	Based on Mean	0.255923	8	45	0.976666
	Based on Median	0.220048	8	45	0.985541
	Based on Median and with adjusted df	0.220048	8	36.0269	0.985054
	Based on trimmed mean	0.264264	8	45	0.97423
Ci	Based on Mean	1.05785	8	45	0.408955
	Based on Median	0.832853	8	45	0.578607
	Based on Median and with adjusted df	0.832853	8	31.9385	0.580626
	Based on trimmed mean	1.00162	8	45	0.448192
Gs	Based on Mean	3.05785	8	45	0.00778835
	Based on Median	2.52405	8	45	0.0232704
	Based on Median and with adjusted df	2.52405	8	20.2656	0.0439663
	Based on trimmed mean	3.04468	8	45	0.00800008
Tr	Based on Mean	3.9758	8	45	0.00124723
	Based on Median	3.53337	8	45	0.00298497
	Based on Median and with adjusted df	3.53337	8	12.0008	0.0244668
	Based on trimmed mean	3.91795	8	45	0.00139632
FvFm	Based on Mean	1.3381	8	45	0.249864
	Based on Median	1.02222	8	45	0.433546
	Based on Median and with adjusted df	1.02222	8	30.5927	0.440703
	Based on trimmed mean	1.3018	8	45	0.267081
PSⅡ	Based on Mean	0.843288	8	45	0.57009
	Based on Median	0.706859	8	45	0.683893
	Based on Median and with adjusted df	0.706859	8	31.4179	0.683312
	Based on trimmed mean	0.813236	8	45	0.594735
ETR	Based on Mean	0.857468	8	45	0.558595
	Based on Median	0.744016	8	45	0.652562
	Based on Median and with adjusted df	0.744016	8	31.8472	0.652706
	Based on trimmed mean	0.825902	8	45	0.584305
NPQ	Based on Mean	0.975598	8	45	0.467127
	Based on Median	0.791593	8	45	0.612686
	Based on Median and with adjusted df	0.791593	8	35.8564	0.613383
	Based on trimmed mean	0.952385	8	45	0.484417
ANOVA
				Sum of Squares	df	Mean Square	F	Sig.
Pn	Between Groups	(Combined)		213.17	8	26.6462	82.7382	2.47372e-24
		Linear Term	Contrast	9.31668	1	9.31668	28.9289	2.5837e-06
			Deviation	203.853	7	29.1219	90.4252	2.30923e-24
	Within Groups			14.4925	45	0.322055
	Total			227.662	53
Ci	Between Groups	(Combined)		105930	8	13241.3	138.632	4.32767e-29
		Linear Term	Contrast	13252.6	1	13252.6	138.75	2.41607e-15
			Deviation	92677.4	7	13239.6	138.615	2.76442e-28
	Within Groups			4298.13	45	95.5139
	Total			110228	53
Gs	Between Groups	(Combined)		0.170911	8	0.0213639	174.948	2.8329e-31
		Linear Term	Contrast	0.00146453	1	0.00146453	11.993	0.00118293
			Deviation	0.169447	7	0.0242067	198.228	1.23358e-31
	Within Groups			0.0054952	45	0.000122116
	Total			0.176406	53
Tr	Between Groups	(Combined)		96.5257	8	12.0657	221.087	1.72534e-33
		Linear Term	Contrast	0.00940111	1	0.00940111	0.172262	0.680081
			Deviation	96.5163	7	13.788	252.646	6.22582e-34
	Within Groups			2.45585	45	0.0545745
	Total			98.9816	53
FvFm	Between Groups	(Combined)		0.00385639	8	0.000482049	9.11769	2.40928e-07
		Linear Term	Contrast	0.00145224	1	0.00145224	27.4683	4.10663e-06
			Deviation	0.00240415	7	0.00034345	6.49617	2.59709e-05
	Within Groups			0.00237913	45	5.28696e-05
	Total			0.00623552	53
PSⅡ	Between Groups	(Combined)		0.191126	8	0.0238907	15.4106	1.30277e-10
		Linear Term	Contrast	0.0765625	1	0.0765625	49.3862	9.27581e-09
			Deviation	0.114563	7	0.0163662	10.5569	9.06838e-08
	Within Groups			0.0697627	45	0.00155028
	Total			0.260888	53
ETR	Between Groups	(Combined)		5628	8	703.5	14.7564	2.5651e-10
		Linear Term	Contrast	2083.21	1	2083.21	43.6969	3.86299e-08
			Deviation	3544.79	7	506.398	10.6221	8.36469e-08
	Within Groups			2145.33	45	47.6741
	Total			7773.33	53
NPQ	Between Groups	(Combined)		0.307576	8	0.038447	2.91766	0.010368
		Linear Term	Contrast	0.0234432	1	0.0234432	1.77906	0.188977
			Deviation	0.284133	7	0.0405904	3.08032	0.00972854
	Within Groups			0.59298	45	0.0131773
	Total			0.900556	53
Post Hoc Tests
Homogeneous Subsets
Pn
Treatment		N	Subset for alpha = 0.05
			1	2	3	4	5
Student-Newman-Keulsa	DS-14d	6	4.35066
	DS-7d	6		6.23553
	MT+DS-14d	6		6.45577
	MT+DS-0d	6			7.56698
	DS-0d	6			7.63414
	CK-0d	6			7.63803
	MT+DS-7d	6			7.71335
	CK-7d	6				10.3783
	CK-14d	6					11.3631
	Sig.		1	0.504909	0.969923	1	1
Duncana	DS-14d	6	4.35066
	DS-7d	6		6.23553
	MT+DS-14d	6		6.45577
	MT+DS-0d	6			7.56698
	DS-0d	6			7.63414
	CK-0d	6			7.63803
	MT+DS-7d	6			7.71335
	CK-7d	6				10.3783
	CK-14d	6					11.3631
	Sig.		1	0.504909	0.689012	1	1
Means for groups in homogeneous subsets are displayed.
a. Uses Harmonic Mean Sample Size = 6.000.
Ci
Treatment		N	Subset for alpha = 0.05
			1	2	3	4	5
Student-Newman-Keulsa	DS-14d	6	135.214
	MT+DS-14d	6		159.281
	DS-7d	6			192.407
	MT+DS-7d	6				209.238
	MT+DS-0d	6				210.539
	DS-0d	6				211.415
	CK-0d	6				211.416
	CK-7d	6					275.286
	CK-14d	6					280.113
	Sig.		1	1	1	0.98021	0.396825
Duncana	DS-14d	6	135.214
	MT+DS-14d	6		159.281
	DS-7d	6			192.407
	MT+DS-7d	6				209.238
	MT+DS-0d	6				210.539
	DS-0d	6				211.415
	CK-0d	6				211.416
	CK-7d	6					275.286
	CK-14d	6					280.113
	Sig.		1	1	1	0.729513	0.396825
Means for groups in homogeneous subsets are displayed.
a. Uses Harmonic Mean Sample Size = 6.000.
Gs
Treatment		N	Subset for alpha = 0.05
			1	2	3	4	5
Student-Newman-Keulsa	DS-14d	6	0.029305
	MT+DS-14d	6		0.0475417
	DS-7d	6		0.0542299
	MT+DS-7d	6			0.074646
	DS-0d	6			0.0786003
	CK-0d	6			0.0794202
	MT+DS-0d	6			0.0800248
	CK-7d	6				0.175583
	CK-14d	6					0.207685
	Sig.		1	0.300098	0.833613	1	1
Duncana	DS-14d	6	0.029305
	MT+DS-14d	6		0.0475417
	DS-7d	6		0.0542299
	MT+DS-7d	6			0.074646
	DS-0d	6			0.0786003
	CK-0d	6			0.0794202
	MT+DS-0d	6			0.0800248
	CK-7d	6				0.175583
	CK-14d	6					0.207685
	Sig.		1	0.300098	0.449987	1	1
Means for groups in homogeneous subsets are displayed.
a. Uses Harmonic Mean Sample Size = 6.000.
Tr
Treatment		N	Subset for alpha = 0.05
			1	2	3	4	5	6
Student-Newman-Keulsa	DS-14d	6	0.841122
	MT+DS-14d	6		1.37673
	DS-7d	6		1.44748	1.44748
	CK-0d	6			1.78534	1.78534
	DS-0d	6			1.7904	1.7904
	MT+DS-0d	6			1.7916	1.7916
	MT+DS-7d	6				1.9232
	CK-7d	6					4.27232
	CK-14d	6						5.05399
	Sig.		1	0.60247	0.0654765	0.73746	1	1
Duncana	DS-14d	6	0.841122
	MT+DS-14d	6		1.37673
	DS-7d	6		1.44748
	CK-0d	6			1.78534
	DS-0d	6			1.7904
	MT+DS-0d	6			1.7916
	MT+DS-7d	6			1.9232
	CK-7d	6				4.27232
	CK-14d	6					5.05399
	Sig.		1	0.60247	0.359678	1	1
Means for groups in homogeneous subsets are displayed.
a. Uses Harmonic Mean Sample Size = 6.000.
FvFm
Treatment		N	Subset for alpha = 0.05
			1	2	3
Student-Newman-Keulsa	DS-14d	6	0.768405
	DS-7d	6		0.778112
	MT+DS-14d	6		0.782396	0.782396
	MT+DS-7d	6		0.786008	0.786008
	CK-0d	6			0.792051
	CK-7d	6			0.792689
	DS-0d	6			0.793055
	CK-14d	6			0.79381
	MT+DS-0d	6			0.794439
	Sig.		1	0.155989	0.0837016
Duncana	DS-14d	6	0.768405
	DS-7d	6		0.778112
	MT+DS-14d	6		0.782396
	MT+DS-7d	6		0.786008	0.786008
	CK-0d	6			0.792051
	CK-7d	6			0.792689
	DS-0d	6			0.793055
	CK-14d	6			0.79381
	MT+DS-0d	6			0.794439
	Sig.		1	0.0812995	0.0836191
Means for groups in homogeneous subsets are displayed.
a. Uses Harmonic Mean Sample Size = 6.000.
PSⅡ
Treatment		N	Subset for alpha = 0.05
			1	2	3
Student-Newman-Keulsa	DS-14d	6	0.487667
	DS-7d	6	0.518167	0.518167
	MT+DS-7d	6		0.549
	MT+DS-14d	6		0.5505
	CK-0d	6			0.629833
	MT+DS-0d	6			0.639667
	DS-0d	6			0.64
	CK-14d	6			0.640833
	CK-7d	6			0.652
	Sig.		0.186425	0.338169	0.864955
Duncana	DS-14d	6	0.487667
	DS-7d	6	0.518167	0.518167
	MT+DS-7d	6		0.549
	MT+DS-14d	6		0.5505
	CK-0d	6			0.629833
	MT+DS-0d	6			0.639667
	DS-0d	6			0.64
	CK-14d	6			0.640833
	CK-7d	6			0.652
	Sig.		0.186425	0.18647	0.393794
Means for groups in homogeneous subsets are displayed.
a. Uses Harmonic Mean Sample Size = 6.000.
ETR
Treatment		N	Subset for alpha = 0.05
			1	2	3
Student-Newman-Keulsa	DS-14d	6	85.5
	DS-7d	6	91	91
	MT+DS-7d	6		96.5
	MT+DS-14d	6		96.6667
	CK-0d	6			109.5
	DS-0d	6			111.333
	MT+DS-0d	6			111.5
	CK-14d	6			112.667
	CK-7d	6			114.333
	Sig.		0.174499	0.338594	0.744223
Duncana	DS-14d	6	85.5
	DS-7d	6	91	91
	MT+DS-7d	6		96.5
	MT+DS-14d	6		96.6667
	CK-0d	6			109.5
	DS-0d	6			111.333
	MT+DS-0d	6			111.5
	CK-14d	6			112.667
	CK-7d	6			114.333
	Sig.		0.174499	0.186731	0.288843
Means for groups in homogeneous subsets are displayed.
a. Uses Harmonic Mean Sample Size = 6.000.
NPQ
Treatment		N	Subset for alpha = 0.05
			1	2
Student-Newman-Keulsa	CK-14d	6	0.201057
	CK-7d	6	0.235289
	MT+DS-7d	6	0.24861
	CK-0d	6	0.267859
	DS-0d	6	0.274764
	MT+DS-14d	6	0.277658
	MT+DS-0d	6	0.294981
	DS-7d	6	0.324126
	DS-14d	6		0.481268
	Sig.		0.586216	1
Duncana	CK-14d	6	0.201057
	CK-7d	6	0.235289
	MT+DS-7d	6	0.24861
	CK-0d	6	0.267859
	DS-0d	6	0.274764
	MT+DS-14d	6	0.277658
	MT+DS-0d	6	0.294981
	DS-7d	6	0.324126
	DS-14d	6		0.481268
	Sig.		0.118437	1
Means for groups in homogeneous subsets are displayed.
a. Uses Harmonic Mean Sample Size = 6.000.
ONEWAY RWC BY Treatment
/STATISTICS DESCRIPTIVES EFFECTS HOMOGENEITY
/MISSING ANALYSIS
/POSTHOC=SNK DUNCAN ALPHA(0.05).
Oneway
Notes
Output Created		19-MAR-2023 11:34:55
Comments
Input	Data	D:\desktop\paper2\spss\1P.sav
	Active Dataset	date0
	Filter	<none>
	Weight	<none>
	Split File	<none>
	N of Rows in Working Data File	54
Missing Value Handling	Definition of Missing	User-defined missing values are treated as missing.
	Cases Used	Statistics for each analysis are based on cases with no missing data for any variable in the analysis.
Syntax		ONEWAY RWC BY Treatment /STATISTICS DESCRIPTIVES EFFECTS HOMOGENEITY /MISSING ANALYSIS /POSTHOC=SNK DUNCAN ALPHA(0.05).
Resources	Processor Time	00:00:00.09
	Elapsed Time	00:00:00.08
Descriptives
RWC
		N	Mean	Std. Deviation	Std. Error	95% Confidence Interval for Mean		Minimum	Maximum	Between- Component Variance
						Lower Bound	Upper Bound
CK-0d		6	90.6851	1.52556	0.622806	89.0841	92.286	89.4308	93.3288
DS-0d		6	90.5118	1.44458	0.589748	88.9958	92.0278	88.7064	92.5741
MT+DS-0d		6	90.5921	1.28107	0.522993	89.2477	91.9365	89.1603	92.5941
CK-7d		6	90.5836	2.17478	0.887851	88.3013	92.8659	88.2211	93.8961
DS-7d		6	80.8245	1.52777	0.623709	79.2212	82.4278	78.4255	82.3359
MT+DS-7d		6	86.286	0.969426	0.395767	85.2687	87.3034	84.6835	87.3807
CK-14d		6	90.6896	2.06313	0.842271	88.5245	92.8548	88.3544	94.2715
DS-14d		6	75.6668	2.35572	0.961719	73.1946	78.139	72.6707	78.944
MT+DS-14d		6	84.9309	1.44843	0.591319	83.4109	86.451	82.6075	86.7531
Total		54	86.7523	5.40151	0.735052	85.2779	88.2266	72.6707	94.2715
Model	Fixed Effects			1.69845	0.23113	86.2867	87.2178
	Random Effects				1.8108	82.5765	90.928			29.0302
Test of Homogeneity of Variances
		Levene Statistic	df1	df2	Sig.
RWC	Based on Mean	1.01085	8	45	0.441587
	Based on Median	0.596135	8	45	0.775863
	Based on Median and with adjusted df	0.596135	8	29.1654	0.773075
	Based on trimmed mean	0.99293	8	45	0.454461
ANOVA
RWC
	Sum of Squares	df	Mean Square	F	Sig.
Between Groups	1416.53	8	177.066	61.3802	1.17432e-21
Within Groups	129.813	45	2.88474
Total	1546.34	53
Post Hoc Tests
Homogeneous Subsets
RWC
Treatment		N	Subset for alpha = 0.05
			1	2	3	4
Student-Newman-Keulsa	DS-14d	6	75.6668
	DS-7d	6		80.8245
	MT+DS-14d	6			84.9309
	MT+DS-7d	6			86.286
	DS-0d	6				90.5118
	CK-7d	6				90.5836
	MT+DS-0d	6				90.5921
	CK-0d	6				90.6851
	CK-14d	6				90.6896
	Sig.		1	1	0.173836	0.999748
Duncana	DS-14d	6	75.6668
	DS-7d	6		80.8245
	MT+DS-14d	6			84.9309
	MT+DS-7d	6			86.286
	DS-0d	6				90.5118
	CK-7d	6				90.5836
	MT+DS-0d	6				90.5921
	CK-0d	6				90.6851
	CK-14d	6				90.6896
	Sig.		1	1	0.173836	0.874045
Means for groups in homogeneous subsets are displayed.
a. Uses Harmonic Mean Sample Size = 6.000.
DATASET ACTIVATE date2.
ONEWAY MDA BY Treatment
/STATISTICS DESCRIPTIVES EFFECTS HOMOGENEITY
/MISSING ANALYSIS
/POSTHOC=SNK DUNCAN ALPHA(0.05).
Oneway
Notes
Output Created		19-MAR-2023 11:35:27
Comments
Input	Data	D:\desktop\paper2\spss\3P.sav
	Active Dataset	date2
	Filter	<none>
	Weight	<none>
	Split File	<none>
	N of Rows in Working Data File	27
Missing Value Handling	Definition of Missing	User-defined missing values are treated as missing.
	Cases Used	Statistics for each analysis are based on cases with no missing data for any variable in the analysis.
Syntax		ONEWAY MDA BY Treatment /STATISTICS DESCRIPTIVES EFFECTS HOMOGENEITY /MISSING ANALYSIS /POSTHOC=SNK DUNCAN ALPHA(0.05).
Resources	Processor Time	00:00:00.09
	Elapsed Time	00:00:00.08
[date2] D:\desktop\paper2\spss\3P.sav
Descriptives
MDA
		N	Mean	Std. Deviation	Std. Error	95% Confidence Interval for Mean		Minimum	Maximum	Between- Component Variance
						Lower Bound	Upper Bound
CK-0d		3	8.52941	1.34782	0.778162	5.18125	11.8776	7.05882	9.70588
DS-0d		3	9.70588	1.52828	0.882354	5.90942	13.5023	8.82353	11.4706
MT+DS-0d		3	8.82353	0.882353	0.509427	6.63164	11.0154	7.94118	9.70588
CK-7d		3	9.11765	1.83677	1.06046	4.55487	13.6804	7.05882	10.5882
DS-7d		3	21.7647	1.34782	0.778162	18.4165	25.1129	20.2941	22.9412
MT+DS-7d		3	16.1765	1.83676	1.06046	11.6137	20.7392	14.1176	17.6471
CK-14d		3	11.1765	1.83676	1.06045	6.6137	15.7392	9.70588	13.2353
DS-14d		3	44.4118	3.09872	1.78905	36.7141	52.1094	41.4706	47.6471
MT+DS-14d		3	23.8235	3.18137	1.83676	15.9206	31.7265	21.1765	27.3529
Total		27	17.0588	11.4366	2.20098	12.5347	21.583	7.05882	47.6471
Model	Fixed Effects			2.01637	0.38805	16.2436	17.8741
	Random Effects				3.92494	8.0079	26.1097			137.291
Test of Homogeneity of Variances
		Levene Statistic	df1	df2	Sig.
MDA	Based on Mean	1.1647	8	18	0.371161
	Based on Median	0.405798	8	18	0.902626
	Based on Median and with adjusted df	0.405798	8	12.2548	0.896687
	Based on trimmed mean	1.09545	8	18	0.410069
ANOVA
MDA
	Sum of Squares	df	Mean Square	F	Sig.
Between Groups	3327.51	8	415.939	102.303	2.05377e-13
Within Groups	73.1834	18	4.06574
Total	3400.69	26
Post Hoc Tests
Homogeneous Subsets
MDA
Treatment		N	Subset for alpha = 0.05
			1	2	3	4
Student-Newman-Keulsa	CK-0d	3	8.52941
	MT+DS-0d	3	8.82353
	CK-7d	3	9.11765
	DS-0d	3	9.70588
	CK-14d	3	11.1765
	MT+DS-7d	3		16.1765
	DS-7d	3			21.7647
	MT+DS-14d	3			23.8235
	DS-14d	3				44.4118
	Sig.		0.511379	1	0.227118	1
Duncana	CK-0d	3	8.52941
	MT+DS-0d	3	8.82353
	CK-7d	3	9.11765
	DS-0d	3	9.70588
	CK-14d	3	11.1765
	MT+DS-7d	3		16.1765
	DS-7d	3			21.7647
	MT+DS-14d	3			23.8235
	DS-14d	3				44.4118
	Sig.		0.163929	1	0.227118	1
Means for groups in homogeneous subsets are displayed.
a. Uses Harmonic Mean Sample Size = 3.000.
ONEWAY POD SOD CAT APX H2O2 O2 IAA ABA GA Ipa MT BY Treatment
/STATISTICS DESCRIPTIVES EFFECTS HOMOGENEITY
/MISSING ANALYSIS
/POSTHOC=SNK DUNCAN ALPHA(0.05).
Oneway
Notes
Output Created		19-MAR-2023 11:36:14
Comments
Input	Data	D:\desktop\paper2\spss\3P.sav
	Active Dataset	date2
	Filter	<none>
	Weight	<none>
	Split File	<none>
	N of Rows in Working Data File	27
Missing Value Handling	Definition of Missing	User-defined missing values are treated as missing.
	Cases Used	Statistics for each analysis are based on cases with no missing data for any variable in the analysis.
Syntax		ONEWAY POD SOD CAT APX H2O2 O2 IAA ABA GA Ipa MT BY Treatment /STATISTICS DESCRIPTIVES EFFECTS HOMOGENEITY /MISSING ANALYSIS /POSTHOC=SNK DUNCAN ALPHA(0.05).
Resources	Processor Time	00:00:00.66
	Elapsed Time	00:00:00.66
Descriptives
			N	Mean	Std. Deviation	Std. Error	95% Confidence Interval for Mean		Minimum	Maximum	Between- Component Variance
							Lower Bound	Upper Bound
POD	CK-0d		3	323.495	10.4648	6.04184	297.499	349.491	312.5	333.333
	DS-0d		3	324.653	4.59332	2.65195	313.242	336.063	321.181	329.861
	MT+DS-0d		3	323.495	6.57281	3.79481	307.168	339.823	315.972	328.125
	CK-7d		3	323.495	8.73823	5.04502	301.788	345.202	314.236	331.597
	DS-7d		3	370.37	7.01641	4.05093	352.941	387.8	362.847	376.736
	MT+DS-7d		3	394.097	6.94444	4.00938	376.846	411.348	387.153	401.042
	CK-14d		3	326.389	10.4167	6.01407	300.512	352.265	315.972	336.806
	DS-14d		3	350.694	9.18664	5.30391	327.874	373.515	340.278	357.639
	MT+DS-14d		3	370.37	7.01641	4.05093	352.941	387.8	362.847	376.736
	Total		27	345.229	26.8988	5.17667	334.588	355.87	312.5	401.042
	Model	Fixed Effects			8.09496	1.55788	341.956	348.502
		Random Effects				9.03507	324.394	366.064			712.849
SOD	CK-0d		3	470.04	21.9901	12.696	415.414	524.667	445.445	487.804
	DS-0d		3	467.236	24.8559	14.3505	405.491	528.981	438.82	484.938
	MT+DS-0d		3	467.236	23.976	13.8425	407.676	526.796	441.615	489.13
	CK-7d		3	482.338	17.1209	9.88475	439.807	524.869	464.575	498.735
	DS-7d		3	629.348	11.2092	6.47162	601.503	657.193	617.702	640.062
	MT+DS-7d		3	656.366	13.4288	7.7531	623.008	689.725	644.255	670.808
	CK-14d		3	480.28	19.8297	11.4487	431.02	529.539	462.578	501.708
	DS-14d		3	602.795	17.4736	10.0884	559.388	646.202	585.559	620.497
	MT+DS-14d		3	643.323	19.0766	11.0139	595.934	690.712	626.087	663.82
	Total		27	544.329	83.6025	16.0893	511.257	577.401	438.82	670.808
	Model	Fixed Effects			19.2579	3.70618	536.543	552.116
		Random Effects				28.4677	478.683	609.976			7170.05
CAT	CK-0d		3	37.704	3.55824	2.05435	28.8648	46.5432	33.9336	41.0031
	DS-0d		3	37.704	3.62779	2.0945	28.6921	46.7159	34.6405	41.7101
	MT+DS-0d		3	37.9397	4.26129	2.46026	27.354	48.5253	33.9336	42.417
	CK-7d		3	41.0031	5.6556	3.26526	26.9538	55.0524	35.3475	46.6587
	DS-7d		3	52.3143	4.4149	2.54894	41.3471	63.2815	48.7796	57.2629
	MT+DS-7d		3	67.3959	6.86628	3.96425	50.3391	84.4527	61.5046	74.9367
	CK-14d		3	43.124	4.30021	2.48273	32.4416	53.8063	38.1753	45.9517
	DS-14d		3	25.4502	3.08152	1.77912	17.7953	33.1051	23.3294	28.985
	MT+DS-14d		3	35.1118	2.94327	1.6993	27.8004	42.4233	31.8128	37.4684
	Total		27	41.9719	11.9992	2.30924	37.2252	46.7186	23.3294	74.9367
	Model	Fixed Effects			4.46286	0.858877	40.1674	43.7763
		Random Effects				3.95869	32.8431	51.1006			134.402
APX	CK-0d		3	108.929	18.8136	10.8621	62.1929	155.664	91.0714	128.571
	DS-0d		3	108.929	26.9637	15.5675	41.947	175.91	80.3571	133.929
	MT+DS-0d		3	107.143	19.3155	11.1518	59.1606	155.125	85.7143	123.214
	CK-7d		3	121.429	17.2208	9.94244	78.6497	164.207	101.786	133.929
	DS-7d		3	317.857	30.462	17.5872	242.185	393.529	283.929	342.857
	MT+DS-7d		3	383.929	34.8557	20.124	297.342	470.515	348.214	417.857
	CK-14d		3	128.571	19.3155	11.1518	80.5892	176.554	107.143	144.643
	DS-14d		3	221.429	34.8558	20.124	134.842	308.015	187.5	257.143
	MT+DS-14d		3	332.143	37.5	21.6506	238.988	425.298	294.643	369.643
	Total		27	203.373	110.914	21.3454	159.497	247.249	80.3571	417.857
	Model	Fixed Effects			27.6642	5.32397	192.188	214.558
		Random Effects				37.6432	116.568	290.178			12498
H2O2	CK-0d		3	0.542618	0.0897088	0.0517934	0.319769	0.765467	0.482984	0.645787
	DS-0d		3	0.516379	0.099157	0.0572483	0.270059	0.762699	0.449635	0.630318
	MT+DS-0d		3	0.519871	0.135157	0.0780328	0.184123	0.855619	0.410536	0.670984
	CK-7d		3	0.742728	0.160258	0.0925248	0.344626	1.14083	0.577457	0.897451
	DS-7d		3	2.92197	0.389933	0.225128	1.95333	3.89062	2.64862	3.3685
	MT+DS-7d		3	1.42472	0.339641	0.196092	0.581003	2.26843	1.16318	1.80858
	CK-14d		3	1.02197	0.158662	0.0916035	0.627834	1.41611	0.881004	1.19379
	DS-14d		3	5.31684	0.646226	0.373098	3.71153	6.92216	4.66079	5.95277
	MT+DS-14d		3	3.48551	0.474341	0.273861	2.30718	4.66384	3.0267	3.97399
	Total		27	1.83251	1.65905	0.319284	1.17621	2.48881	0.410536	5.95277
	Model	Fixed Effects			0.332835	0.0640542	1.69794	1.96709
		Random Effects				0.567522	0.523804	3.14122			2.86181
O2	CK-0d		3	17.631	4.10129	2.36788	7.44283	27.8192	13.1561	21.2109
	DS-0d		3	17.631	5.58912	3.22688	3.74687	31.5151	13.1561	23.8958
	MT+DS-0d		3	16.736	4.10129	2.36788	6.54786	26.9242	13.1561	21.2109
	CK-7d		3	20.3159	3.10028	1.78995	12.6144	28.0175	18.526	23.8958
	DS-7d		3	38.2154	4.10129	2.36788	28.0273	48.4036	34.6355	42.6903
	MT+DS-7d		3	28.3707	3.10028	1.78995	20.6692	36.0722	26.5807	31.9506
	CK-14d		3	23.0009	4.10129	2.36788	12.8127	33.189	18.526	26.5807
	DS-14d		3	57.0099	6.75691	3.9011	40.2248	73.795	50.7451	64.1697
	MT+DS-14d		3	35.5305	4.10129	2.36788	25.3423	45.7187	31.9506	40.0054
	Total		27	28.2713	13.3656	2.57221	22.984	33.5585	13.1561	64.1697
	Model	Fixed Effects			4.47487	0.86119	26.462	30.0805
		Random Effects				4.45355	18.0013	38.5412			171.832
IAA	CK-0d		3	26.7454	1.43113	0.826264	23.1903	30.3006	25.4143	28.259
	DS-0d		3	26.306	1.67078	0.964623	22.1556	30.4564	24.8587	28.1344
	MT+DS-0d		3	28.7333	2.15891	1.24645	23.3702	34.0963	26.4459	30.7353
	CK-7d		3	37.8408	2.67248	1.54296	31.202	44.4796	35.172	40.5169
	DS-7d		3	30.392	1.24205	0.717097	27.3066	33.4774	29.1472	31.6313
	MT+DS-7d		3	59.6046	2.62568	1.51594	53.0821	66.1272	56.6964	61.801
	CK-14d		3	48.1428	2.30584	1.33128	42.4148	53.8709	45.6537	50.2061
	DS-14d		3	22.89	1.08699	0.627575	20.1898	25.5902	21.771	23.9418
	MT+DS-14d		3	59.8516	1.99446	1.1515	54.8971	64.8062	57.9637	61.9378
	Total		27	37.8341	14.0306	2.70019	32.2838	43.3844	21.771	61.9378
	Model	Fixed Effects			1.98763	0.382519	37.0304	38.6377
		Random Effects				4.83389	26.6871	48.981			208.982
ABA	CK-0d		3	62.8964	4.16721	2.40594	52.5445	73.2483	59.9595	67.6659
	DS-0d		3	63.2863	4.32255	2.49563	52.5485	74.0241	59.8229	68.1306
	MT+DS-0d		3	63.1151	4.75993	2.74815	51.2908	74.9394	59.2795	68.4421
	CK-7d		3	72.2688	4.28095	2.47161	61.6343	82.9033	67.9753	76.5371
	DS-7d		3	116.854	6.65087	3.83988	100.332	133.376	109.503	122.454
	MT+DS-7d		3	88.1479	7.04165	4.0655	70.6555	105.64	82.899	96.1502
	CK-14d		3	73.489	4.39394	2.53684	62.5739	84.4042	69.3854	78.1248
	DS-14d		3	154.463	8.63566	4.9858	133.011	175.915	145.97	163.235
	MT+DS-14d		3	109.173	9.06069	5.23119	86.6654	131.681	99.9525	118.065
	Total		27	89.2993	30.8205	5.93142	77.1071	101.492	59.2795	163.235
	Model	Fixed Effects			6.20779	1.19469	86.7894	91.8093
		Random Effects				10.5418	64.9899	113.609			987.317
GA	CK-0d		3	2.96344	0.14721	0.0849918	2.59775	3.32913	2.83922	3.12604
	DS-0d		3	2.98301	0.118847	0.0686162	2.68778	3.27824	2.89838	3.11888
	MT+DS-0d		3	3.06298	0.168619	0.0973525	2.64411	3.48186	2.89838	3.23535
	CK-7d		3	2.92286	0.141137	0.0814853	2.57226	3.27347	2.78765	3.06926
	DS-7d		3	2.87128	0.115792	0.0668528	2.58364	3.15893	2.7749	2.99973
	MT+DS-7d		3	3.37075	0.208248	0.120232	2.85343	3.88806	3.15482	3.57035
	CK-14d		3	2.98532	0.186698	0.10779	2.52153	3.4491	2.81331	3.18387
	DS-14d		3	2.51489	0.130457	0.0753196	2.19081	2.83896	2.37454	2.63245
	MT+DS-14d		3	3.17251	0.174398	0.100689	2.73928	3.60574	2.99973	3.34848
	Total		27	2.983	0.258042	0.0496603	2.88093	3.08508	2.37454	3.57035
	Model	Fixed Effects			0.157484	0.0303079	2.91933	3.04668
		Random Effects				0.0771245	2.80515	3.16085			0.0452666
Ipa	CK-0d		3	2.37563	0.292603	0.168935	1.64876	3.1025	2.10518	2.68624
	DS-0d		3	2.3284	0.293874	0.169668	1.59838	3.05842	2.06285	2.64413
	MT+DS-0d		3	2.47462	0.326808	0.188683	1.66278	3.28645	2.12907	2.77873
	CK-7d		3	3.13165	0.20876	0.120527	2.61306	3.65024	2.96668	3.36635
	DS-7d		3	2.24829	0.248876	0.143689	1.63004	2.86653	2.00773	2.50473
	MT+DS-7d		3	3.60732	0.23443	0.135348	3.02496	4.18967	3.35119	3.81124
	CK-14d		3	3.50327	0.233662	0.134905	2.92282	4.08371	3.25429	3.71779
	DS-14d		3	1.98683	0.209341	0.120863	1.4668	2.50686	1.75347	2.15809
	MT+DS-14d		3	3.72372	0.188239	0.10868	3.25611	4.19133	3.56979	3.93359
	Total		27	2.81997	0.676139	0.130123	2.5525	3.08744	1.75347	3.93359
	Model	Fixed Effects			0.252348	0.0485643	2.71794	2.922
		Random Effects				0.222985	2.30576	3.33417			0.426275
MT	CK-0d		3	12.5892	0.906022	0.523092	10.3386	14.8399	11.6591	13.4691
	DS-0d		3	12.8155	1.17156	0.6764	9.90517	15.7258	11.5083	13.7707
	MT+DS-0d		3	13.0417	0.921582	0.532076	10.7524	15.3311	12.0362	13.8461
	CK-7d		3	14.3238	0.880557	0.50839	12.1364	16.5112	13.5445	15.279
	DS-7d		3	13.3937	0.65311	0.377073	11.7713	15.0161	12.6395	13.7707
	MT+DS-7d		3	14.6757	0.944945	0.545564	12.3283	17.0231	13.6953	15.5807
	CK-14d		3	15.1031	0.604884	0.34923	13.6005	16.6057	14.5249	15.7315
	DS-14d		3	12.2876	1.09892	0.63446	9.55772	15.0174	11.0558	13.1674
	MT+DS-14d		3	16.36	0.566029	0.326797	14.9539	17.7661	15.8069	16.9382
	Total		27	13.8434	1.49716	0.288128	13.2511	14.4356	11.0558	16.9382
	Model	Fixed Effects			0.883898	0.170106	13.486	14.2007
		Random Effects				0.452439	12.8	14.8867			1.58188
Test of Homogeneity of Variances
		Levene Statistic	df1	df2	Sig.
POD	Based on Mean	0.314973	8	18	0.950068
	Based on Median	0.190711	8	18	0.988931
	Based on Median and with adjusted df	0.190711	8	15.2167	0.988311
	Based on trimmed mean	0.30597	8	18	0.953946
SOD	Based on Mean	0.489838	8	18	0.847709
	Based on Median	0.138016	8	18	0.996208
	Based on Median and with adjusted df	0.138016	8	12.4423	0.995586
	Based on trimmed mean	0.457448	8	18	0.869888
CAT	Based on Mean	0.54211	8	18	0.809862
	Based on Median	0.228365	8	18	0.980513
	Based on Median and with adjusted df	0.228365	8	13.9446	0.978988
	Based on trimmed mean	0.515342	8	18	0.829519
APX	Based on Mean	0.389671	8	18	0.912071
	Based on Median	0.307218	8	18	0.953418
	Based on Median and with adjusted df	0.307218	8	15.1952	0.951673
	Based on trimmed mean	0.385307	8	18	0.914557
H2O2	Based on Mean	1.91764	8	18	0.119775
	Based on Median	1.04664	8	18	0.439425
	Based on Median and with adjusted df	1.04664	8	8.99372	0.468906
	Based on trimmed mean	1.86117	8	18	0.130417
O2	Based on Mean	0.466667	8	18	0.863691
	Based on Median	0.209459	8	18	0.985097
	Based on Median and with adjusted df	0.209459	8	15.6457	0.984452
	Based on trimmed mean	0.444775	8	18	0.878243
IAA	Based on Mean	0.536891	8	18	0.813735
	Based on Median	0.284453	8	18	0.962556
	Based on Median and with adjusted df	0.284453	8	13.391	0.959734
	Based on trimmed mean	0.518944	8	18	0.826905
ABA	Based on Mean	0.551653	8	18	0.802736
	Based on Median	0.315054	8	18	0.950032
	Based on Median and with adjusted df	0.315054	8	14.0938	0.947324
	Based on trimmed mean	0.535186	8	18	0.814996
GA	Based on Mean	0.184853	8	18	0.989988
	Based on Median	0.153844	8	18	0.994527
	Based on Median and with adjusted df	0.153844	8	16.7113	0.994382
	Based on trimmed mean	0.183109	8	18	0.990291
Ipa	Based on Mean	0.187527	8	18	0.989514
	Based on Median	0.120011	8	18	0.997657
	Based on Median and with adjusted df	0.120011	8	16.8918	0.997599
	Based on trimmed mean	0.18285	8	18	0.990335
MT	Based on Mean	0.482837	8	18	0.852596
	Based on Median	0.163113	8	18	0.99335
	Based on Median and with adjusted df	0.163113	8	14.0665	0.992726
	Based on trimmed mean	0.453907	8	18	0.872242
ANOVA
		Sum of Squares	df	Mean Square	F	Sig.
POD	Between Groups	17632.6	8	2204.08	33.6354	2.76804e-09
	Within Groups	1179.51	18	65.5284
	Total	18812.1	26
SOD	Between Groups	175048	8	21881	58.9999	2.42287e-11
	Within Groups	6675.58	18	370.865
	Total	181724	26
CAT	Between Groups	3384.98	8	423.122	21.2442	1.1379e-07
	Within Groups	358.508	18	19.9171
	Total	3743.49	26
APX	Between Groups	306074	8	38259.2	49.992	9.96321e-11
	Within Groups	13775.5	18	765.306
	Total	319849	26
H2O2	Between Groups	69.5696	8	8.6962	78.5002	2.06391e-12
	Within Groups	1.99403	18	0.110779
	Total	71.5636	26
O2	Between Groups	4284.17	8	535.522	26.7433	1.80769e-08
	Within Groups	360.441	18	20.0245
	Total	4644.61	26
IAA	Between Groups	5047.17	8	630.897	159.694	4.08682e-15
	Within Groups	71.1118	18	3.95066
	Total	5118.28	26
ABA	Between Groups	24003.9	8	3000.49	77.8607	2.21567e-12
	Within Groups	693.659	18	38.5366
	Total	24697.6	26
GA	Between Groups	1.28481	8	0.160601	6.4755	0.000503642
	Within Groups	0.446425	18	0.0248014
	Total	1.73123	26
Ipa	Between Groups	10.74	8	1.3425	21.0823	1.20861e-07
	Within Groups	1.14623	18	0.0636794
	Total	11.8863	26
MT	Between Groups	44.2154	8	5.52692	7.07422	0.000293474
	Within Groups	14.063	18	0.781276
	Total	58.2783	26
Post Hoc Tests
Homogeneous Subsets
POD
Treatment		N	Subset for alpha = 0.05
			1	2	3	4
Student-Newman-Keulsa	CK-0d	3	323.495
	MT+DS-0d	3	323.495
	CK-7d	3	323.495
	DS-0d	3	324.653
	CK-14d	3	326.389
	DS-14d	3		350.694
	DS-7d	3			370.37
	MT+DS-14d	3			370.37
	MT+DS-7d	3				394.097
	Sig.		0.991698	1	1	1
Duncana	CK-0d	3	323.495
	MT+DS-0d	3	323.495
	CK-7d	3	323.495
	DS-0d	3	324.653
	CK-14d	3	326.389
	DS-14d	3		350.694
	DS-7d	3			370.37
	MT+DS-14d	3			370.37
	MT+DS-7d	3				394.097
	Sig.		0.698149	1	1	1
Means for groups in homogeneous subsets are displayed.
a. Uses Harmonic Mean Sample Size = 3.000.
SOD
Treatment		N	Subset for alpha = 0.05
			1	2	3
Student-Newman-Keulsa	MT+DS-0d	3	467.236
	DS-0d	3	467.236
	CK-0d	3	470.04
	CK-14d	3	480.28
	CK-7d	3	482.338
	DS-14d	3		602.795
	DS-7d	3		629.348	629.348
	MT+DS-14d	3			643.323
	MT+DS-7d	3			656.366
	Sig.		0.869067	0.108529	0.225714
Duncana	MT+DS-0d	3	467.236
	DS-0d	3	467.236
	CK-0d	3	470.04
	CK-14d	3	480.28
	CK-7d	3	482.338
	DS-14d	3		602.795
	DS-7d	3		629.348	629.348
	MT+DS-14d	3			643.323
	MT+DS-7d	3			656.366
	Sig.		0.398463	0.108529	0.120065
Means for groups in homogeneous subsets are displayed.
a. Uses Harmonic Mean Sample Size = 3.000.
CAT
Treatment		N	Subset for alpha = 0.05
			1	2	3	4
Student-Newman-Keulsa	DS-14d	3	25.4502
	MT+DS-14d	3		35.1118
	CK-0d	3		37.704
	DS-0d	3		37.704
	MT+DS-0d	3		37.9397
	CK-7d	3		41.0031
	CK-14d	3		43.124
	DS-7d	3			52.3143
	MT+DS-7d	3				67.3959
	Sig.		1	0.285503	1	1
Duncana	DS-14d	3	25.4502
	MT+DS-14d	3		35.1118
	CK-0d	3		37.704
	DS-0d	3		37.704
	MT+DS-0d	3		37.9397
	CK-7d	3		41.0031
	CK-14d	3		43.124
	DS-7d	3			52.3143
	MT+DS-7d	3				67.3959
	Sig.		1	0.0650248	1	1
Means for groups in homogeneous subsets are displayed.
a. Uses Harmonic Mean Sample Size = 3.000.
APX
Treatment		N	Subset for alpha = 0.05
			1	2	3	4
Student-Newman-Keulsa	MT+DS-0d	3	107.143
	CK-0d	3	108.929
	DS-0d	3	108.929
	CK-7d	3	121.429
	CK-14d	3	128.571
	DS-14d	3		221.429
	DS-7d	3			317.857
	MT+DS-14d	3			332.143
	MT+DS-7d	3				383.929
	Sig.		0.873956	1	0.53504	1
Duncana	MT+DS-0d	3	107.143
	CK-0d	3	108.929
	DS-0d	3	108.929
	CK-7d	3	121.429
	CK-14d	3	128.571
	DS-14d	3		221.429
	DS-7d	3			317.857
	MT+DS-14d	3			332.143
	MT+DS-7d	3				383.929
	Sig.		0.404159	1	0.53504	1
Means for groups in homogeneous subsets are displayed.
a. Uses Harmonic Mean Sample Size = 3.000.
H2O2
Treatment		N	Subset for alpha = 0.05
			1	2	3	4
Student-Newman-Keulsa	DS-0d	3	0.516379
	MT+DS-0d	3	0.519871
	CK-0d	3	0.542618
	CK-7d	3	0.742728	0.742728
	CK-14d	3	1.02197	1.02197
	MT+DS-7d	3		1.42472
	DS-7d	3			2.92197
	MT+DS-14d	3			3.48551
	DS-14d	3				5.31684
	Sig.		0.37214	0.0543944	0.0527355	1
Duncana	DS-0d	3	0.516379
	MT+DS-0d	3	0.519871
	CK-0d	3	0.542618
	CK-7d	3	0.742728
	CK-14d	3	1.02197	1.02197
	MT+DS-7d	3		1.42472
	DS-7d	3			2.92197
	MT+DS-14d	3			3.48551
	DS-14d	3				5.31684
	Sig.		0.109845	0.155637	0.0527355	1
Means for groups in homogeneous subsets are displayed.
a. Uses Harmonic Mean Sample Size = 3.000.
O2
Treatment		N	Subset for alpha = 0.05
			1	2	3	4	5
Student-Newman-Keulsa	MT+DS-0d	3	16.736
	CK-0d	3	17.631	17.631
	DS-0d	3	17.631	17.631
	CK-7d	3	20.3159	20.3159
	CK-14d	3	23.0009	23.0009
	MT+DS-7d	3		28.3707	28.3707
	MT+DS-14d	3			35.5305	35.5305
	DS-7d	3				38.2154
	DS-14d	3					57.0099
	Sig.		0.450138	0.0590443	0.0657151	0.471899	1
Duncana	MT+DS-0d	3	16.736
	CK-0d	3	17.631
	DS-0d	3	17.631
	CK-7d	3	20.3159
	CK-14d	3	23.0009	23.0009
	MT+DS-7d	3		28.3707	28.3707
	MT+DS-14d	3			35.5305	35.5305
	DS-7d	3				38.2154
	DS-14d	3					57.0099
	Sig.		0.138881	0.158907	0.0657151	0.471899	1
Means for groups in homogeneous subsets are displayed.
a. Uses Harmonic Mean Sample Size = 3.000.
IAA
Treatment		N	Subset for alpha = 0.05
			1	2	3	4	5	6
Student-Newman-Keulsa	DS-14d	3	22.89
	DS-0d	3	26.306	26.306
	CK-0d	3	26.7454	26.7454
	MT+DS-0d	3		28.7333
	DS-7d	3		30.392
	CK-7d	3			37.8408
	CK-14d	3				48.1428
	MT+DS-7d	3					59.6046
	MT+DS-14d	3					59.8516
	Sig.		0.0705751	0.0907976	1	1	0.880724
Duncana	DS-14d	3	22.89
	DS-0d	3		26.306
	CK-0d	3		26.7454
	MT+DS-0d	3		28.7333	28.7333
	DS-7d	3			30.392
	CK-7d	3				37.8408
	CK-14d	3					48.1428
	MT+DS-7d	3						59.6046
	MT+DS-14d	3						59.8516
	Sig.		1	0.173162	0.320281	1	1	0.880724
Means for groups in homogeneous subsets are displayed.
a. Uses Harmonic Mean Sample Size = 3.000.
ABA
Treatment		N	Subset for alpha = 0.05
			1	2	3	4
Student-Newman-Keulsa	CK-0d	3	62.8964
	MT+DS-0d	3	63.1151
	DS-0d	3	63.2863
	CK-7d	3	72.2688
	CK-14d	3	73.489
	MT+DS-7d	3		88.1479
	MT+DS-14d	3			109.173
	DS-7d	3			116.854
	DS-14d	3				154.463
	Sig.		0.266569	1	0.147061	1
Duncana	CK-0d	3	62.8964
	MT+DS-0d	3	63.1151
	DS-0d	3	63.2863
	CK-7d	3	72.2688
	CK-14d	3	73.489
	MT+DS-7d	3		88.1479
	MT+DS-14d	3			109.173
	DS-7d	3			116.854
	DS-14d	3				154.463
	Sig.		0.074578	1	0.147061	1
Means for groups in homogeneous subsets are displayed.
a. Uses Harmonic Mean Sample Size = 3.000.
GA
Treatment		N	Subset for alpha = 0.05
			1	2	3
Student-Newman-Keulsa	DS-14d	3	2.51489
	DS-7d	3		2.87128
	CK-7d	3		2.92286
	CK-0d	3		2.96344	2.96344
	DS-0d	3		2.98301	2.98301
	CK-14d	3		2.98532	2.98532
	MT+DS-0d	3		3.06298	3.06298
	MT+DS-14d	3		3.17251	3.17251
	MT+DS-7d	3			3.37075
	Sig.		1	0.277483	0.0510414
Duncana	DS-14d	3	2.51489
	DS-7d	3		2.87128
	CK-7d	3		2.92286
	CK-0d	3		2.96344
	DS-0d	3		2.98301
	CK-14d	3		2.98532
	MT+DS-0d	3		3.06298
	MT+DS-14d	3		3.17251	3.17251
	MT+DS-7d	3			3.37075
	Sig.		1	0.052728	0.140544
Means for groups in homogeneous subsets are displayed.
a. Uses Harmonic Mean Sample Size = 3.000.
Ipa
Treatment		N	Subset for alpha = 0.05
			1	2	3	4
Student-Newman-Keulsa	DS-14d	3	1.98683
	DS-7d	3	2.24829
	DS-0d	3	2.3284
	CK-0d	3	2.37563
	MT+DS-0d	3	2.47462
	CK-7d	3		3.13165
	CK-14d	3		3.50327	3.50327
	MT+DS-7d	3		3.60732	3.60732
	MT+DS-14d	3			3.72372
	Sig.		0.169644	0.0802045	0.544128
Duncana	DS-14d	3	1.98683
	DS-7d	3	2.24829	2.24829
	DS-0d	3	2.3284	2.3284
	CK-0d	3	2.37563	2.37563
	MT+DS-0d	3		2.47462
	CK-7d	3			3.13165
	CK-14d	3			3.50327	3.50327
	MT+DS-7d	3				3.60732
	MT+DS-14d	3				3.72372
	Sig.		0.098814	0.326822	0.088056	0.324817
Means for groups in homogeneous subsets are displayed.
a. Uses Harmonic Mean Sample Size = 3.000.
MT
Treatment		N	Subset for alpha = 0.05
			1	2	3	4	5
Student-Newman-Keulsa	DS-14d	3	12.2876
	CK-0d	3	12.5892	12.5892
	DS-0d	3	12.8155	12.8155	12.8155
	MT+DS-0d	3	13.0417	13.0417	13.0417
	DS-7d	3	13.3937	13.3937	13.3937
	CK-7d	3	14.3238	14.3238	14.3238	14.3238
	MT+DS-7d	3		14.6757	14.6757	14.6757
	CK-14d	3			15.1031	15.1031
	MT+DS-14d	3				16.36
	Sig.		0.0991536	0.0870479	0.0508288	0.0504879
Duncana	DS-14d	3	12.2876
	CK-0d	3	12.5892
	DS-0d	3	12.8155	12.8155
	MT+DS-0d	3	13.0417	13.0417	13.0417
	DS-7d	3	13.3937	13.3937	13.3937
	CK-7d	3		14.3238	14.3238	14.3238
	MT+DS-7d	3			14.6757	14.6757
	CK-14d	3				15.1031	15.1031
	MT+DS-14d	3					16.36
	Sig.		0.183655	0.0693478	0.0505116	0.32049	0.0986411
Means for groups in homogeneous subsets are displayed.
a. Uses Harmonic Mean Sample Size = 3.000.
DATASET ACTIVATE date3.
ONEWAY RBCL NYC1 WRKY27 WRKY71 NAC12 YUC5 NCED2 GA3ox2 IPT1 SNAT BY Treatment
/STATISTICS DESCRIPTIVES EFFECTS HOMOGENEITY
/MISSING ANALYSIS
/POSTHOC=SNK DUNCAN ALPHA(0.05).
Oneway
Notes
Output Created		19-MAR-2023 11:37:45
Comments
Input	Data	D:\desktop\paper2\spss\4P.sav
	Active Dataset	date3
	Filter	<none>
	Weight	<none>
	Split File	<none>
	N of Rows in Working Data File	9
Missing Value Handling	Definition of Missing	User-defined missing values are treated as missing.
	Cases Used	Statistics for each analysis are based on cases with no missing data for any variable in the analysis.
Syntax		ONEWAY RBCL NYC1 WRKY27 WRKY71 NAC12 YUC5 NCED2 GA3ox2 IPT1 SNAT BY Treatment /STATISTICS DESCRIPTIVES EFFECTS HOMOGENEITY /MISSING ANALYSIS /POSTHOC=SNK DUNCAN ALPHA(0.05).
Resources	Processor Time	00:00:00.11
	Elapsed Time	00:00:00.10
[date3] D:\desktop\paper2\spss\4P.sav
Descriptives
			N	Mean	Std. Deviation	Std. Error	95% Confidence Interval for Mean		Minimum	Maximum	Between- Component Variance
							Lower Bound	Upper Bound
RBCL	CK		3	1	0.00290282	0.00167595	0.992789	1.00721	0.997627	1.00324
	DS		3	0.251335	0.0444874	0.0256848	0.140822	0.361848	0.215093	0.300984
	MT+DS		3	0.900514	0.0458407	0.0264661	0.78664	1.01439	0.862759	0.951521
	Total		9	0.717283	0.353555	0.117852	0.445517	0.989049	0.215093	1.00324
	Model	Fixed Effects			0.0369185	0.0123062	0.687171	0.747395
		Random Effects				0.234738	-0.292711	1.72728			0.164851
NYC1	CK		3	1	0.00884844	0.00510865	0.978019	1.02198	0.990948	1.00863
	DS		3	5.4869	0.728483	0.42059	3.67724	7.29655	4.9661	6.31937
	MT+DS		3	2.72874	0.385511	0.222575	1.77108	3.6864	2.32565	3.09386
	Total		9	3.07188	2.00272	0.667572	1.53245	4.6113	0.990948	6.31937
	Model	Fixed Effects			0.47588	0.158627	2.68373	3.46002
		Random Effects				1.30657	-2.54983	8.69359			5.04588
WRKY27	CK		3	1	0.0282358	0.0163019	0.929858	1.07014	0.977251	1.0316
	DS		3	2.31295	0.1531	0.0883922	1.93263	2.69327	2.19647	2.48636
	MT+DS		3	1.55251	0.0780277	0.0450493	1.35868	1.74634	1.47611	1.63207
	Total		9	1.62182	0.577496	0.192499	1.17792	2.06572	0.977251	2.48636
	Model	Fixed Effects			0.10054	0.0335135	1.53982	1.70382
		Random Effects				0.380597	-0.0157544	3.2594			0.431192
WRKY71	CK		3	1	0.00289721	0.00167271	0.992803	1.0072	0.996999	1.00278
	DS		3	6.9897	1.60266	0.925298	3.00847	10.9709	5.5714	8.72834
	MT+DS		3	4.10816	0.572434	0.330495	2.68616	5.53017	3.48061	4.60171
	Total		9	4.03262	2.73022	0.910074	1.93399	6.13126	0.996999	8.72834
	Model	Fixed Effects			0.982551	0.327517	3.23122	4.83403
		Random Effects				1.72949	-3.40878	11.474			8.65161
NAC12	CK		3	1	0.000776771	0.000448469	0.99807	1.00193	0.999426	1.00088
	DS		3	155.596	10.669	6.15978	129.092	182.099	148.445	167.859
	MT+DS		3	31.1046	1.26942	0.732903	27.9511	34.258	30.1946	32.5547
	Total		9	62.5667	71.182	23.7273	7.85141	117.282	0.999426	167.859
	Model	Fixed Effects			6.20322	2.06774	57.5072	67.6263
		Random Effects				47.3193	-141.032	266.165			6704.53
YUC5	CK		3	1	0.0302521	0.017466	0.92485	1.07515	0.969593	1.03009
	DS		3	0.184077	0.0675814	0.0390181	0.0161959	0.351959	0.11586	0.251004
	MT+DS		3	1.14402	0.0432242	0.0249555	1.03665	1.2514	1.1063	1.19119
	Total		9	0.776033	0.450371	0.150124	0.429848	1.12222	0.11586	1.19119
	Model	Fixed Effects			0.0495	0.0165	0.735659	0.816407
		Random Effects				0.298884	-0.50996	2.06203			0.267178
NCED2	CK		3	1	0.0382376	0.0220765	0.905012	1.09499	0.957465	1.03152
	DS		3	2.4482	0.344029	0.198625	1.59358	3.30282	2.13153	2.81425
	MT+DS		3	1.35683	0.252592	0.145834	0.729361	1.98431	1.10461	1.60979
	Total		9	1.60168	0.687653	0.229218	1.0731	2.13025	0.957465	2.81425
	Model	Fixed Effects			0.2474	0.0824667	1.39989	1.80347
		Random Effects				0.435615	-0.272624	3.47598			0.54888
GA3ox2	CK		3	1	0.00605181	0.00349401	0.984966	1.01503	0.995499	1.00688
	DS		3	0.551057	0.13211	0.0762736	0.222878	0.879236	0.437692	0.696138
	MT+DS		3	1.26721	0.166407	0.096075	0.853829	1.68058	1.09072	1.42126
	Total		9	0.939421	0.330942	0.110314	0.685037	1.19381	0.437692	1.42126
	Model	Fixed Effects			0.12272	0.0409068	0.839326	1.03952
		Random Effects				0.208942	0.040418	1.83842			0.12595
IPT1	CK		3	1	0.0403915	0.0233201	0.899662	1.10034	0.956241	1.03586
	DS		3	0.614039	0.153649	0.0887094	0.232354	0.995725	0.462238	0.769472
	MT+DS		3	1.42052	0.10516	0.0607141	1.15929	1.68175	1.29911	1.48302
	Total		9	1.01152	0.362078	0.120693	0.733201	1.28984	0.462238	1.48302
	Model	Fixed Effects			0.109997	0.0366657	0.921801	1.10124
		Random Effects				0.232881	0.009511	2.01353			0.158668
SNAT	CK		3	1	0.0130696	0.00754571	0.967533	1.03247	0.991412	1.01504
	DS		3	0.353995	0.0448045	0.0258679	0.242695	0.465296	0.307844	0.397319
	MT+DS		3	0.83126	0.102542	0.0592028	0.576531	1.08599	0.716444	0.913726
	Total		9	0.728418	0.295585	0.0985283	0.501212	0.955625	0.307844	1.01504
	Model	Fixed Effects			0.0650465	0.0216822	0.675364	0.781473
		Random Effects				0.193445	-0.103908	1.56074			0.110852
Test of Homogeneity of Variances
		Levene Statistic	df1	df2	Sig.
RBCL	Based on Mean	4.20168	2	6	0.0722874
	Based on Median	1.07364	2	6	0.399406
	Based on Median and with adjusted df	1.07364	2	4.01561	0.423137
	Based on trimmed mean	3.85926	2	6	0.0836628
NYC1	Based on Mean	6.22386	2	6	0.0344053
	Based on Median	1.05808	2	6	0.404019
	Based on Median and with adjusted df	1.05808	2	2.55421	0.462677
	Based on trimmed mean	5.55351	2	6	0.0431451
WRKY27	Based on Mean	3.85916	2	6	0.0836663
	Based on Median	0.832344	2	6	0.479701
	Based on Median and with adjusted df	0.832344	2	2.69368	0.523046
	Based on trimmed mean	3.51964	2	6	0.0974299
WRKY71	Based on Mean	4.99878	2	6	0.0527586
	Based on Median	2.11599	2	6	0.201639
	Based on Median and with adjusted df	2.11599	2	2.53696	0.287982
	Based on trimmed mean	4.7616	2	6	0.0577445
NAC12	Based on Mean	13.0331	2	6	0.00655104
	Based on Median	1.22835	2	6	0.357151
	Based on Median and with adjusted df	1.22835	2	2.04968	0.446025
	Based on trimmed mean	10.8028	2	6	0.0102674
YUC5	Based on Mean	0.668103	2	6	0.547066
	Based on Median	0.5504	2	6	0.603298
	Based on Median and with adjusted df	0.5504	2	4.52376	0.611014
	Based on trimmed mean	0.66152	2	6	0.550021
NCED2	Based on Mean	2.13823	2	6	0.199032
	Based on Median	1.47713	2	6	0.30086
	Based on Median and with adjusted df	1.47713	2	3.63887	0.339124
	Based on trimmed mean	2.09741	2	6	0.203853
GA3ox2	Based on Mean	3.1457	2	6	0.116319
	Based on Median	1.54881	2	6	0.28686
	Based on Median and with adjusted df	1.54881	2	3.94046	0.318922
	Based on trimmed mean	3.0255	2	6	0.12342
IPT1	Based on Mean	1.442	2	6	0.308056
	Based on Median	0.676516	2	6	0.543319
	Based on Median and with adjusted df	0.676516	2	4.19202	0.556381
	Based on trimmed mean	1.38796	2	6	0.319578
SNAT	Based on Mean	4.46671	2	6	0.0648598
	Based on Median	1.19652	2	6	0.36534
	Based on Median and with adjusted df	1.19652	2	2.59277	0.428414
	Based on trimmed mean	4.1294	2	6	0.0745085
ANOVA
		Sum of Squares	df	Mean Square	F	Sig.
RBCL	Between Groups	0.991831	2	0.495916	363.848	5.46898e-07
	Within Groups	0.00817785	6	0.00136298
	Total	1.00001	8
NYC1	Between Groups	30.7282	2	15.3641	67.8441	7.59368e-05
	Within Groups	1.35877	6	0.226462
	Total	32.087	8
WRKY27	Between Groups	2.60737	2	1.30368	128.971	1.17472e-05
	Within Groups	0.0606503	6	0.0101084
	Total	2.66802	8
WRKY71	Between Groups	53.8405	2	26.9202	27.8849	0.000916485
	Within Groups	5.79244	6	0.965406
	Total	59.6329	8
NAC12	Between Groups	40304.2	2	20152.1	523.703	1.84785e-07
	Within Groups	230.88	6	38.48
	Total	40535	8
YUC5	Between Groups	1.60797	2	0.803984	328.123	7.437e-07
	Within Groups	0.0147015	6	0.00245025
	Total	1.62267	8
NCED2	Between Groups	3.41569	2	1.70785	27.9029	0.000914887
	Within Groups	0.367241	6	0.0612069
	Total	3.78294	8
GA3ox2	Between Groups	0.785819	2	0.392909	26.0891	0.00109691
	Within Groups	0.0903616	6	0.0150603
	Total	0.876181	8
IPT1	Between Groups	0.976208	2	0.488104	40.3412	0.000331635
	Within Groups	0.0725963	6	0.0120994
	Total	1.0488	8
SNAT	Between Groups	0.673577	2	0.336788	79.5992	4.79112e-05
	Within Groups	0.0253863	6	0.00423105
	Total	0.698963	8
Post Hoc Tests
Homogeneous Subsets
RBCL
Treatment		N	Subset for alpha = 0.05
			1	2	3
Student-Newman-Keulsa	DS	3	0.251335
	MT+DS	3		0.900514
	CK	3			1
	Sig.		1	1	1
Duncana	DS	3	0.251335
	MT+DS	3		0.900514
	CK	3			1
	Sig.		1	1	1
Means for groups in homogeneous subsets are displayed.
a. Uses Harmonic Mean Sample Size = 3.000.
NYC1
Treatment		N	Subset for alpha = 0.05
			1	2	3
Student-Newman-Keulsa	CK	3	1
	MT+DS	3		2.72874
	DS	3			5.4869
	Sig.		1	1	1
Duncana	CK	3	1
	MT+DS	3		2.72874
	DS	3			5.4869
	Sig.		1	1	1
Means for groups in homogeneous subsets are displayed.
a. Uses Harmonic Mean Sample Size = 3.000.
WRKY27
Treatment		N	Subset for alpha = 0.05
			1	2	3
Student-Newman-Keulsa	CK	3	1
	MT+DS	3		1.55251
	DS	3			2.31295
	Sig.		1	1	1
Duncana	CK	3	1
	MT+DS	3		1.55251
	DS	3			2.31295
	Sig.		1	1	1
Means for groups in homogeneous subsets are displayed.
a. Uses Harmonic Mean Sample Size = 3.000.
WRKY71
Treatment		N	Subset for alpha = 0.05
			1	2	3
Student-Newman-Keulsa	CK	3	1
	MT+DS	3		4.10816
	DS	3			6.9897
	Sig.		1	1	1
[truncated: 84 more rows]
